# Supplementary material for: Transcriptomic comparison between beetle strains selected for short and long durations of death feigning
Source: PubMed Central journal article supplement (PMC6768993; doi:10.1038/s41598-019-50440-5), 2019-09-30
Supplement: 41598_2019_50440_MOESM1_ESM.pdf [file 41598_2019_50440_MOESM1_ESM.pdf]

Title page for S1 Table

**The title of manuscript:** Transcriptomic comparison between beetle strains selected for short and long durations of death feigning.

**The author list:**

Hironobu Uchiyama

Ken Sasaki

Shogo Hinosawa

Keisuke Tanaka

Kentarou Matsumura

Shunsuke Yajima

Takahisa Miyatake

| S1 Table. Sequence summary of each sample. |                |           |                        |                          |                 |     |
|--------------------------------------------|----------------|-----------|------------------------|--------------------------|-----------------|-----|
| Sample ID                                  | Description    | Platform  | Sequencing protocol    | Total number of sequence | Sequence length | %GC |
| SAMD00151344                               | DF Long line 1 | HiSeq2500 | Single read 100 cycles | 26,956,970               | 35-100          | 40  |
| SAMD00151345                               | DF Long line 2 | HiSeq2500 | Single read 100 cycles | 24,079,235               | 35-100          | 41  |
| SAMD00151346                               | DF Long line 3 | HiSeq2500 | Single read 100 cycles | 27,113,745               | 35-100          | 41  |
| SAMD00151347                               | DF Short line1 | HiSeq2500 | Single read 100 cycles | 27,657,283               | 35-100          | 43  |
| SAMD00151348                               | DF Short line2 | HiSeq2500 | Single read 100 cycles | 29,495,302               | 35-100          | 44  |
| SAMD00151349                               | DF Short line3 | HiSeq2500 | Single read 100 cycles | 23,963,878               | 35-100          | 44  |
