# Supplementary material for: Transcriptomic comparison between beetle strains selected for short and long durations of death feigning
Source: PubMed Central journal article supplement (PMC6768993; doi:10.1038/s41598-019-50440-5), 2019-09-30
Supplement: 41598_2019_50440_MOESM2_ESM.pdf [file 41598_2019_50440_MOESM2_ESM.pdf]

Title page for S2 Table

The title of : Transcriptomic comparison between beetle strains selected for manuscript short and long durations of death feigning.

The author list: Hironobu Uchiyama, Ken Sasaki, Shogo Hinomura, Keisuke Tanaka, Kentarou Matsumura, Shunsuke Yajima, Takahisa Miyatake

S2 Table. List of differentially expressed genes between the L and S strains.

| #  | LOC name     | Region                        | Gene ID   | Description                                                 | FPKM for L | FPKM for S | log2(Fold change+1) | P-value  | FDR        |
|----|--------------|-------------------------------|-----------|-------------------------------------------------------------|------------|------------|---------------------|----------|------------|
| 1  | LOC107398286 | NC_007417.3:1379768-1380361   | 107398286 | uncharacterized LOC107398286                                | 52.2821    | 0.502158   | 5.148542473         | 0.00105  | 0.0470692  |
| 2  | -            | NW_015452025.1:2991-3878      | -         | -                                                           | 25.5962    | 0.26362    | 4.39558555          | 0.0006   | 0.0297494  |
| 3  | P41          | NC_007418.3:10353706-10354992 | 661254    | serine protease P41                                         | 85.9659    | 1.24604    | 5.274994294         | 5.00E-05 | 0.00352415 |
| 4  | LOC657769    | NW_015451510.1:1505-3305      | 657769    | facilitated trehalose transporter Tret1                     | 19.1283    | 0.688605   | 3.575321534         | 5.00E-05 | 0.00352415 |
| 5  | LOC660420    | NC_007423.3:9398892-9400590   | 660420    | equilibrative nucleoside transporter 3                      | 23.1626    | 1.15738    | 3.485423484         | 5.00E-05 | 0.00352415 |
| 6  | LOC664395    | NC_007417.3:8685030-8689026   | 664395    | alpha-amylase-like                                          | 6.53327    | 0.42944    | 2.397826173         | 5.00E-05 | 0.00352415 |
| 7  | LOC655017    | NW_015450971.1:3368-5214      | 655017    | moesin/ezrin/radixin homolog 1                              | 7.75219    | 0.692362   | 2.370605861         | 5.00E-05 | 0.00352415 |
| 8  | LOC655071    | NC_007423.3:4594602-4595685   | 655071    | uncharacterized LOC655071                                   | 2.7097     | 0.244532   | 1.575699196         | 0.0009   | 0.0416491  |
| 9  | LOC103312472 | NC_007418.3:25460046-25495251 | 103312472 | uncharacterized LOC103312472                                | 28.4757    | 2.9537     | 2.898250764         | 5.00E-05 | 0.00352415 |
| 10 | H115         | NC_007420.3:1471291-1478664   | 657133    | serine protease H115                                        | 11.7177    | 1.23055    | 2.511366389         | 0.00085  | 0.0395751  |
| 11 | -            | NC_007423.3:54121-55236       | -         | -                                                           | 12.8197    | 1.37677    | 2.539652092         | 5.00E-05 | 0.00352415 |
| 12 | LOC103314782 | NW_015450575.1:82793-86861    | 103314782 | uncharacterized                                             | 109.221    | 13.0229    | 2.97454248          | 5.00E-05 | 0.00352415 |
| 13 | LOC657849    | NW_015451510.1:6335-7969      | 657849    | facilitated trehalose transporter Tret1                     | 10.8051    | 1.29803    | 2.360940725         | 5.00E-05 | 0.00352415 |
| 14 | LOC100142014 | NW_015452111.1:26-1007        | 100142014 | uncharacterized LOC100142014                                | 4.30895    | 0.552973   | 1.773393807         | 5.00E-05 | 0.00352415 |
| 15 | LOC103314746 | NC_007422.5:7413296-7414494   | 103314746 | uncharacterized LOC103314746                                | 6.57533    | 0.84491    | 2.037758298         | 5.00E-05 | 0.00352415 |
| 16 | LOC103312957 | NC_007420.3:5088956-5091766   | 103312957 | adhesion G-protein coupled receptor G2                      | 3.29397    | 0.450013   | 1.566246277         | 5.00E-05 | 0.00352415 |
| 17 | LOC103312900 | NC_007420.3:3289609-3290934   | 103312900 | uncharacterized LOC103312900                                | 10.0159    | 1.39886    | 2.1991665           | 5.00E-05 | 0.00352415 |
| 18 | En           | NC_007422.5:12546768-12551040 | 661645    | engrailed                                                   | 1.75671    | 0.246453   | 1.145119023         | 0.0001   | 0.00663971 |
| 19 | -            | NC_007417.3:5261973-5262712   | -         | -                                                           | 6.67451    | 0.964678   | 1.965781759         | 0.00015  | 0.00949185 |
| 20 | LOC103312546 | NC_007419.2:733210-738581     | 103312546 | uncharacterized LOC103312546                                | 4.68397    | 0.709      | 1.733746543         | 0.00015  | 0.00949185 |
| 21 | p98; p97     | NC_007422.5:7350928-7355730   | 662682    | serine protease P98                                         | 110.405    | 16.9       | 2.637782492         | 5.00E-05 | 0.00352415 |
| 22 | LOC658555    | NC_007416.3:1023768-1025032   | 658555    | phospholipase A1                                            | 40.6537    | 6.27272    | 2.517877714         | 5.00E-05 | 0.00352415 |
| 23 | LOC103314809 | NC_007423.3:48118-53973       | 103314809 | hypothetical protein                                        | 0.901306   | 0.148064   | 0.727787672         | 5.00E-05 | 0.00352415 |
| 24 | P162         | NC_007421.3:3491859-3492749   | 658877    | serine protease P162                                        | 324.702    | 54.0901    | 2.563687592         | 5.00E-05 | 0.00352415 |
| 25 | LOC657602    | NC_007418.3:11094440-11095409 | 657602    | glutathione S-transferase                                   | 92.1045    | 15.5342    | 2.493397656         | 5.00E-05 | 0.00352415 |
| 26 | P167         | NW_015451646.1:123355-125194  | 655811    | brachyurin                                                  | 133.333    | 22.6791    | 2.504127605         | 5.00E-05 | 0.00352415 |
| 27 | LOC658800    | NC_007421.3:215514-217461     | 658800    | fatty acyl-CoA reductase 1                                  | 3.83549    | 0.721094   | 1.490336197         | 5.00E-05 | 0.00352415 |
| 28 | -            | NC_007420.3:3291809-3294329   | -         | -                                                           | 8.07394    | 1.54969    | 1.83140727          | 0.00075  | 0.0357178  |
| 29 | LOC103313637 | NC_007422.5:8621702-8632850   | 103313637 | uncharacterized LOC103313637                                | 3.94685    | 0.779097   | 1.475364983         | 0.0002   | 0.0120247  |
| 30 | LOC103312194 | NC_007417.3:14780923-14782632 | 103312194 | uncharacterized LOC103312194                                | 279.889    | 56.7282    | 2.282651981         | 5.00E-05 | 0.00352415 |
| 31 | LOC103314784 | NC_007417.3:13814650-13958477 | 103314784 | choline transporter-like protein 1                          | 15.1393    | 3.08012    | 1.983894518         | 0.00105  | 0.0470692  |
| 32 | -            | NC_007422.5:15644810-15650547 | -         | -                                                           | 1.55942    | 0.336451   | 0.937409969         | 5.00E-05 | 0.00352415 |
| 33 | H106         | NC_007420.3:1492710-1493841   | 657444    | serine protease H106                                        | 36.19      | 7.84701    | 2.071652889         | 5.00E-05 | 0.00352415 |
| 34 | LOC655001    | NC_007422.5:1534305-1564073   | 655001    | cytochrome P450 4C1                                         | 325.439    | 71.757     | 2.165655465         | 5.00E-05 | 0.00352415 |
| 35 | LOC103314085 | NC_007423.3:12238186-12238830 | 103314085 | uncharacterized LOC103314085                                | 41.5406    | 9.34823    | 2.039456357         | 5.00E-05 | 0.00352415 |
| 36 | -            | NC_007418.3:16224511-16225266 | -         | -                                                           | 5.56382    | 1.25218    | 1.54321354          | 0.0003   | 0.0169681  |
| 37 | LOC103314667 | NW_015451779.1:18-981         | 103314667 | RNA-directed DNA polymerase from mobile element jockey-like | 75.816     | 17.1427    | 2.082017667         | 5.00E-05 | 0.00352415 |
| 38 | -            | NW_015450592.1:2313-2963      | -         | -                                                           | 18.8732    | 4.35037    | 1.893113627         | 5.00E-05 | 0.00352415 |

|    |                |                               |           |                                                       |         |          |             |             |            |            |
|----|----------------|-------------------------------|-----------|-------------------------------------------------------|---------|----------|-------------|-------------|------------|------------|
| 39 | -              | NW_015451028.1:939-1324       | -         | -                                                     | -       | 52.9167  | 12.2117     | 2.028916083 | 5.00E-05   | 0.00352415 |
| 40 | LOC661967      | NC_007419.2:10352167-10455479 | 661967    | UDP-glucuronosyltransferase 2B20                      | 177.795 | 42.1197  | 2.051887346 | 5.00E-05    | 0.00352415 |            |
| 41 | LOC100142031   | NC_007423.3:6587154-6588963   | 100142031 | sulfhydryl oxidase 2                                  | 8.20063 | 1.98056  | 1.626149235 | 5.00E-05    | 0.00352415 |            |
| 42 | LOC659565      | NC_007425.3:6902757-6908923   | 659565    | cathepsin L precursor                                 | 1.93697 | 0.475683 | 0.992945688 | 0.00065     | 0.0319518  |            |
| 43 | LOC660784      | NC_007422.5:4982936-4984551   | 660784    | translation initiation factor IF-2                    | 4.01513 | 0.999779 | 1.326446525 | 0.00025     | 0.014684   |            |
| 44 | LOC107397485   | NC_007418.3:2823010-2827641   | 107397485 | uncharacterized LOC107397485                          | 2.77274 | 0.714714 | 1.137644713 | 0.00085     | 0.0395751  |            |
| 45 | LOC664406      | NC_007419.2:5876706-5879343   | 664406    | double-stranded RNA-binding protein Staufen homolog 2 | 13.9026 | 3.62987  | 1.686520464 | 5.00E-05    | 0.00352415 |            |
| 46 | LOC107399160   | NW_015451916.1:2097-6354      | 107399160 | uncharacterized LOC107399160                          | 12.0641 | 3.16001  | 1.650948838 | 5.00E-05    | 0.00352415 |            |
| 47 | LOC107397936   | NC_007420.3:1468245-1469916   | 107397936 | brachyurin-like                                       | 9.28293 | 2.43156  | 1.583314917 | 5.00E-05    | 0.00352415 |            |
| 48 | LOC658629      | NW_015451776.1:33994-49469    | 658629    | excitatory amino acid transporter                     | 38.19   | 10.2554  | 1.799868244 | 5.00E-05    | 0.00352415 |            |
| 49 | LOC103314558   | NW_015451937.1:352665-366702  | 103314558 | uncharacterized LOC103314558                          | 4.35173 | 1.1733   | 1.300117996 | 0.0001      | 0.00663971 |            |
| 50 | -              | NC_007420.3:12858-13232       | -         | -                                                     | 16.973  | 4.59116  | 1.684611704 | 0.0002      | 0.0120247  |            |
| 51 | LOC661353      | NC_007416.3:4610333-4618961   | 661353    | IQ motif and SEC7 domain-containing protein 1         | 9.46672 | 2.56825  | 1.552520807 | 0.00065     | 0.0319518  |            |
| 52 | LOC103313572   | NC_007422.5:6600363-6601159   | 103313572 | uncharacterized LOC103313572                          | 5.6366  | 1.53145  | 1.390480334 | 0.0004      | 0.0218162  |            |
| 53 | LOC664571      | NC_007422.5:9814138-9816152   | 664571    | beta-hexosaminidase subunit alpha                     | 28.4495 | 7.88636  | 1.728578646 | 5.00E-05    | 0.00352415 |            |
| 54 | LOC103314151   | NC_007418.3:31269917-31273035 | 103314151 | caspase-1-like                                        | 124.418 | 35.081   | 1.79743319  | 5.00E-05    | 0.00352415 |            |
| 55 | CYP6BK14       | NC_007421.3:2191548-2200968   | 658048    | cytochrome P450 6a9                                   | 30.1745 | 8.58782  | 1.701091692 | 5.00E-05    | 0.00352415 |            |
| 56 | LOC107398944   | NW_015450750.1:304-5356       | 107398944 | uncharacterized LOC107398944                          | 13.3049 | 3.79053  | 1.57825223  | 5.00E-05    | 0.00352415 |            |
| 57 | LOC100141724   | NC_007420.3:9455633-9460403   | 100141724 | uncharacterized LOC100141724                          | 13.3521 | 3.82245  | 1.573423662 | 5.00E-05    | 0.00352415 |            |
| 58 | Cht11          | NC_007422.5:3380907-3384466   | 661649    | chitinase 11                                          | 160.253 | 46.7731  | 1.7550556   | 5.00E-05    | 0.00352415 |            |
| 59 | LOC662574      | NC_007420.3:4834999-4845524   | 662574    | multidrug resistance-associated protein 4             | 16.9259 | 4.99384  | 1.580493076 | 5.00E-05    | 0.00352415 |            |
| 60 | LOC654890      | NC_007424.3:9-2543            | 654890    | condensin complex subunit 2                           | 1.89934 | 0.561078 | 0.893181901 | 0.00015     | 0.00949185 |            |
| 61 | LOC103314327   | NC_007424.3:13863233-13864178 | 103314327 | uncharacterized LOC103314327                          | 33.4387 | 9.8932   | 1.66060286  | 0.0001      | 0.00663971 |            |
| 62 | LOC657270      | NC_007421.3:3334661-3340656   | 657270    | farnesol dehydrogenase                                | 6.1236  | 1.86657  | 1.313281    | 5.00E-05    | 0.00352415 |            |
| 63 | LOC107399097   | NW_015451667.1:314-924        | 107399097 | uncharacterized LOC107399097                          | 32.5255 | 10.2772  | 1.571849941 | 0.0001      | 0.00663971 |            |
| 64 | Ct1p-6a        | NC_007423.3:9384852-9386634   | 660544    | chymotrypsin-like proteinase 6A precursor             | 580.719 | 183.663  | 1.655427596 | 5.00E-05    | 0.00352415 |            |
| 65 | H112           | NC_007420.3:1445095-1446291   | 656795    | serine protease H112                                  | 711.659 | 227.474  | 1.641181929 | 5.00E-05    | 0.00352415 |            |
| 66 | LOC656564      | NW_015450233.1:639257-647866  | 656564    | alanine--glyoxylate aminotransferase 2-like           | 305.798 | 98.3532  | 1.626650738 | 5.00E-05    | 0.00352415 |            |
| 67 | LOC100142621   | NC_007424.3:5810259-5814549   | 100142621 | uncharacterized LOC100142621                          | 5.36544 | 1.72632  | 1.223305334 | 5.00E-05    | 0.00352415 |            |
| 68 | LOC662738      | NC_007422.5:491494-493570     | 662738    | tenecin-3                                             | 3764.71 | 1211.94  | 1.634413714 | 5.00E-05    | 0.00352415 |            |
| 69 | LOC103313776   | NC_007423.3:2629468-2630331   | 103313776 | 39S ribosomal protein L34, mitochondrial              | 97.6414 | 31.5248  | 1.60065309  | 5.00E-05    | 0.00352415 |            |
| 70 | LOC107397745   | NC_007419.2:5039546-5040153   | 107397745 | putative glycine-rich cell wall structural protein 1  | 8.79459 | 2.86334  | 1.342136453 | 0.0006      | 0.0297494  |            |
| 71 | H110           | NC_007420.3:1394616-1395757   | 656549    | serine protease H110                                  | 71.2404 | 23.2313  | 1.575934074 | 5.00E-05    | 0.00352415 |            |
| 72 | LOC655516      | NC_007418.3:26705775-26718077 | 655516    | CYCLE                                                 | 4.22001 | 1.38464  | 1.130281086 | 5.00E-05    | 0.00352415 |            |
| 73 | LOC103312887   | NC_007420.3:28067-61231       | 103312887 | uncharacterized LOC103312887                          | 3.13478 | 1.03691  | 1.021428333 | 5.00E-05    | 0.00352415 |            |
| 74 | Pmp5-a         | NC_007418.3:628675-630154     | 662504    | peritrophic matrix protein 5-A                        | 1511.45 | 508.411  | 1.569985431 | 5.00E-05    | 0.00352415 |            |
| 75 | LOC100141997   | NC_007421.3:3075173-3079776   | 100141997 | uncharacterized LOC100141997                          | 19.0399 | 6.49399  | 1.419069352 | 5.00E-05    | 0.00352415 |            |
| 76 | LOC103312772   | NW_015451146.1:6-6203         | 103312772 | uncharacterized LOC103312772                          | 3.53287 | 1.22614  | 1.025880461 | 5.00E-05    | 0.00352415 |            |
| 77 | LOC663233      | NC_007422.5:13636232-13653424 | 663233    | beta-mannosidase-like                                 | 50.9604 | 18.1518  | 1.439932545 | 5.00E-05    | 0.00352415 |            |
| 78 | LOC662265      | NC_007422.5:13799677-13816250 | 662265    | 40S ribosomal protein S20                             | 3012.95 | 1073.82  | 1.487560411 | 5.00E-05    | 0.00352415 |            |
| 79 | LOC657457      | NW_015450689.1:72670-73558    | 657457    | pathogenesis-related protein 5                        | 967.362 | 355.99   | 1.439662805 | 5.00E-05    | 0.00352415 |            |
| 80 | LOC662599      | NC_007417.3:12004643-12007708 | 662599    | protein Malvolio                                      | 25.8335 | 9.62938  | 1.335977795 | 5.00E-05    | 0.00352415 |            |
| 81 | OBP02; TcOBP6E | NC_007421.3:4270904-4271453   | 103313402 | uncharacterized LOC103313402                          | 103.94  | 38.8519  | 1.396844281 | 5.00E-05    | 0.00352415 |            |
| 82 | LOC661631      | NC_007419.2:7874608-7876123   | 661631    | lipase 1                                              | 272.785 | 102.308  | 1.406091429 | 5.00E-05    | 0.00352415 |            |

|     |              |                               |           |                                                           |         |         |             |          |            |
|-----|--------------|-------------------------------|-----------|-----------------------------------------------------------|---------|---------|-------------|----------|------------|
| 83  | LOC663761    | NC_007417.3:7304084-7351652   | 663761    | neurotrimin                                               | 35.0154 | 13.1762 | 1.345143065 | 5.00E-05 | 0.00352415 |
| 84  | LOC663779    | NC_007422.5:11443752-11445913 | 663779    | armadillo repeat-containing protein 6 homolog             | 16.9436 | 6.38819 | 1.280176492 | 5.00E-05 | 0.00352415 |
| 85  | LOC103312285 | NC_007418.3:2814876-2817198   | 103312285 | hypothetical protein                                      | 21.085  | 7.98635 | 1.297259674 | 0.0003   | 0.0169681  |
| 86  | LOC660599    | NC_007420.3:9972389-9981631   | 660599    | multidrug resistance-associated protein 4                 | 10.7592 | 4.10827 | 1.202883228 | 0.00055  | 0.0281853  |
| 87  | LOC103313234 | NC_007420.3:14373667-14374332 | 103313234 | uncharacterized LOC103313234                              | 12.3884 | 4.79116 | 1.209059298 | 0.0008   | 0.037707   |
| 88  | Lyz          | NC_007418.3:24192177-24210829 | 658610    | lysozyme                                                  | 366.166 | 143.561 | 1.344754079 | 5.00E-05 | 0.00352415 |
| 89  | LOC107398028 | NC_007420.3:13176967-13177792 | 107398028 | odorant binding protein 26                                | 77.534  | 30.5099 | 1.317512204 | 5.00E-05 | 0.00352415 |
| 90  | LOC655392    | NC_007418.3:11409032-11418268 | 655392    | protein henna                                             | 80.6237 | 31.9052 | 1.310672519 | 5.00E-05 | 0.00352415 |
| 91  | LOC656754    | NC_007418.3:27903750-28035531 | 656754    | lysosomal alpha-mannosidase                               | 122.125 | 48.332  | 1.319528042 | 0.0002   | 0.0120247  |
| 92  | LOC655801    | NC_007424.3:1353531-1382237   | 655801    | high affinity cationic amino acid transporter 1           | 17.9432 | 7.1147  | 1.223070396 | 0.0002   | 0.0120247  |
| 93  | LOC659891    | NC_007422.5:3955419-3957350   | 659891    | forkhead box protein D3                                   | 10.3091 | 4.10524 | 1.147433432 | 5.00E-05 | 0.00352415 |
| 94  | -            | NC_007418.3:16223589-16224312 | -         | -                                                         | 9.77493 | 3.92195 | 1.13037659  | 0.00035  | 0.0194127  |
| 95  | -            | NW_015452251.1:11-762         | -         | -                                                         | 81.3587 | 32.9418 | 1.278857982 | 5.00E-05 | 0.00352415 |
| 96  | LOC103313070 | NC_007420.3:9963200-9966670   | 103313070 | multidrug resistance-associated protein 4                 | 6.60952 | 2.67779 | 1.048966348 | 0.0003   | 0.0169681  |
| 97  | LOC103313186 | NC_007420.3:11563173-11563908 | 103313186 | hypothetical protein                                      | 34.7562 | 14.0855 | 1.245030907 | 5.00E-05 | 0.00352415 |
| 98  | Gpa2         | NC_007424.3:11271960-11272443 | 659603    | glycoprotein hormone alpha 2                              | 16.3984 | 6.70151 | 1.175741397 | 0.0011   | 0.0486442  |
| 99  | LOC661035    | NC_007417.3:11485320-11487090 | 661035    | sorbitol dehydrogenase                                    | 51.8167 | 21.1846 | 1.251435624 | 5.00E-05 | 0.00352415 |
| 100 | LOC662228    | NC_007422.5:12036815-12038954 | 662228    | aromatic amino acid aminotransferase DDB_G0287711         | 125.95  | 52.1341 | 1.25655045  | 5.00E-05 | 0.00352415 |
| 101 | LOC655628    | NC_007424.3:14524749-14529705 | 655628    | retinol dehydrogenase 11                                  | 99.6015 | 41.2924 | 1.250181479 | 5.00E-05 | 0.00352415 |
| 102 | LOC661309    | NC_007425.3:4272561-4275637   | 661309    | double-stranded RNA-specific editase Adar                 | 14.3085 | 5.9376  | 1.141824361 | 5.00E-05 | 0.00352415 |
| 103 | LOC103313095 | NC_007420.3:8434484-8435463   | 103313095 | hypothetical protein                                      | 697.355 | 290.265 | 1.261628249 | 5.00E-05 | 0.00352415 |
| 104 | LOC655554    | NC_007423.3:630271-638678     | 655554    | Niemann-Pick C1 protein                                   | 56.7915 | 23.7143 | 1.225511271 | 5.00E-05 | 0.00352415 |
| 105 | LOC661924    | NC_007420.3:4623499-4626668   | 661924    | rhodopsin 1/6-like                                        | 1611.69 | 674.602 | 1.255223638 | 5.00E-05 | 0.00352415 |
| 106 | LOC662513    | NC_007420.3:13424740-13425890 | 662513    | endocuticle structural glycoprotein SgAbd-8               | 95.3982 | 40.6846 | 1.209491717 | 5.00E-05 | 0.00352415 |
| 107 | LOC656188    | NC_007420.3:14740830-14742118 | 656188    | regucalcin                                                | 46.2716 | 19.7615 | 1.187063015 | 5.00E-05 | 0.00352415 |
| 108 | Cpap3-d2     | NC_007417.3:14931519-14937394 | 662181    | cuticular protein analogous to peritrophins 3-D2          | 25.2063 | 10.9014 | 1.138782385 | 5.00E-05 | 0.00352415 |
| 109 | LOC103313294 | NC_007418.3:19307486-19310005 | 103313294 | uncharacterized LOC103313294                              | 12.443  | 5.38244 | 1.074675157 | 5.00E-05 | 0.00352415 |
| 110 | LOC661007    | NC_007423.3:13829831-13837015 | 661007    | sodium-independent sulfate anion transporter              | 21.4903 | 9.34143 | 1.120867212 | 5.00E-05 | 0.00352415 |
| 111 | LOC655199    | NC_007420.3:3549348-3550655   | 655199    | putative thiosulfate sulfurtransferase, mitochondrial     | 16.0454 | 6.98422 | 1.094159076 | 5.00E-05 | 0.00352415 |
| 112 | CYP301B1     | NC_007419.2:8147128-8149464   | 662872    | cytochrome P450 301B1                                     | 6.34127 | 2.78836 | 0.954456229 | 0.00035  | 0.0194127  |
| 113 | LOC100142166 | NC_007424.3:15004201-15015166 | 100142166 | sortilin-related receptor                                 | 9.50901 | 4.18693 | 1.018673962 | 5.00E-05 | 0.00352415 |
| 114 | Cda2         | NC_007420.3:5690326-5696317   | 657879    | chitin deacetylase 2                                      | 16.8791 | 7.48447 | 1.075377669 | 5.00E-05 | 0.00352415 |
| 115 | -            | NW_015451937.1:344610-351959  | -         | -                                                         | 9.82392 | 4.37748 | 1.009220922 | 5.00E-05 | 0.00352415 |
| 116 | LOC662282    | NC_007416.3:5004669-5011572   | 662282    | protein dispatched                                        | 10.8431 | 4.84512 | 1.018742216 | 0.0004   | 0.0218162  |
| 117 | -            | NC_007425.3:5090887-5094023   | -         | -                                                         | 274.109 | 124.066 | 1.1373137   | 0.0003   | 0.0169681  |
| 118 | LOC655432    | NC_007418.3:26698761-26702399 | 655432    | purine nucleoside phosphorylase                           | 145.397 | 65.8867 | 1.130094716 | 5.00E-05 | 0.00352415 |
| 119 | LOC103314416 | NC_007425.3:4177500-4180560   | 103314416 | major facilitator superfamily domain-containing protein 9 | 29.5831 | 13.4365 | 1.083013634 | 0.0005   | 0.0259129  |
| 120 | LOC656943    | NC_007421.3:100388-102720     | 656943    | putative fatty acyl-CoA reductase CG5065                  | 26.1632 | 11.921  | 1.071935719 | 0.00035  | 0.0194127  |
| 121 | LOC660051    | NC_007421.3:9329348-9338327   | 660051    | facilitated trehalose transporter Tret1                   | 62.3055 | 28.6112 | 1.09618789  | 0.0001   | 0.00663971 |
| 122 | LOC662799    | NC_007420.3:13454931-13455834 | 662799    | cuticular protein                                         | 91.3492 | 41.9589 | 1.104142411 | 5.00E-05 | 0.00352415 |
| 123 | -            | NC_007422.5:3374943-3376651   | -         | -                                                         | 38.266  | 17.5895 | 1.078792672 | 5.00E-05 | 0.00352415 |
| 124 | LOC655457    | NC_007424.3:19100-23233       | 655457    | facilitated trehalose transporter Tret1                   | 26.5642 | 12.3113 | 1.050144257 | 5.00E-05 | 0.00352415 |
| 125 | LOC100124592 | NC_007418.3:10621195-10631319 | 100124592 | aspartate 1-decarboxylase                                 | 11.4935 | 5.3873  | 0.96789958  | 5.00E-05 | 0.00352415 |
| 126 | LOC103313511 | NC_007422.5:497209-497796     | 103313511 | ctenidin-1                                                | 34.4555 | 16.3957 | 1.027278708 | 0.00045  | 0.0239168  |

|     |              |                               |           |                                                                       |         |         |             |          |            |
|-----|--------------|-------------------------------|-----------|-----------------------------------------------------------------------|---------|---------|-------------|----------|------------|
| 127 | LOC661923    | NC_007419.2:7888979-7890342   | 661923    | lipase 3-like                                                         | 188.429 | 90.0108 | 1.057547551 | 5.00E-05 | 0.00352415 |
| 128 | LOC657931    | NW_015451510.1:9032-14230     | 657931    | facilitated trehalose transporter Tret1-2 homolog                     | 119.599 | 57.1615 | 1.052081562 | 5.00E-05 | 0.00352415 |
| 129 | LOC658392    | NC_007418.3:19715813-19736503 | 658392    | proton-coupled amino acid transporter 1                               | 73.4753 | 35.3597 | 1.034421734 | 5.00E-05 | 0.00352415 |
| 130 | LOC661878    | NC_007419.2:7884209-7887092   | 661878    | lipase 3-like                                                         | 354.717 | 171.129 | 1.047239743 | 5.00E-05 | 0.00352415 |
| 131 | LOC661764    | NC_007422.5:5957498-5967074   | 661764    | ninjurin-2                                                            | 120.025 | 58.0114 | 1.036239504 | 5.00E-05 | 0.00352415 |
| 132 | P96          | NC_007422.5:3177207-3178319   | 658137    | brachyurin                                                            | 265.291 | 128.431 | 1.040820471 | 5.00E-05 | 0.00352415 |
| 133 | -            | NW_015451163.1:58-971         | -         | -                                                                     | 11.1149 | 5.39036 | 0.922813384 | 0.00085  | 0.0395751  |
| 134 | UV-opsin     | NC_007418.3:10911917-10954172 | 658900    | opsin, ultraviolet-sensitive                                          | 151.282 | 73.4773 | 1.031872745 | 5.00E-05 | 0.00352415 |
| 135 | LOC664194    | NC_007418.3:6596632-6599094   | 664194    | probable ATP-dependent RNA helicase DDX52                             | 8.08049 | 3.92701 | 0.88205775  | 0.0005   | 0.0259129  |
| 136 | LOC662658    | NC_007424.3:13443648-13448593 | 662658    | 4-hydroxyphenylpyruvate dioxygenase                                   | 517.829 | 254.711 | 1.020744899 | 5.00E-05 | 0.00352415 |
| 137 | LOC656983    | NC_007422.5:6833385-6834282   | 656983    | hypothetical protein                                                  | 691.433 | 340.564 | 1.019518556 | 5.00E-05 | 0.00352415 |
| 138 | LOC659580    | NC_007419.2:10032071-10033682 | 659580    | venom acid phosphatase AcpH-1                                         | 304.625 | 150.18  | 1.015495266 | 5.00E-05 | 0.00352415 |
| 139 | LOC103313593 | NC_007422.5:3615164-3616462   | 103313593 | uncharacterized LOC103313593                                          | 79.2358 | 39.2097 | 0.996702517 | 5.00E-05 | 0.00352415 |
| 140 | Cyp4g14      | NC_007419.2:4413404-4415340   | 662217    | cytochrome P450 monooxygenase                                         | 234.193 | 116.392 | 1.002511027 | 5.00E-05 | 0.00352415 |
| 141 | LOC663325    | NC_007417.3:9989620-9991074   | 663325    | probable phosphoserine aminotransferase                               | 152.021 | 75.7827 | 0.994876459 | 5.00E-05 | 0.00352415 |
| 142 | LOC103314523 | NC_007416.3:7718927-7720296   | 103314523 | uncharacterized LOC103314523                                          | 23.0959 | 11.5492 | 0.941192291 | 5.00E-05 | 0.00352415 |
| 143 | HEX1A        | NC_007423.3:13938454-13940965 | 660335    | arylphorin                                                            | 5.66952 | 2.83945 | 0.796683275 | 0.00045  | 0.0239168  |
| 144 | LOC659104    | NC_007422.5:1194959-1197544   | 659104    | vanin-like protein 2                                                  | 149.815 | 75.4235 | 0.98069169  | 5.00E-05 | 0.00352415 |
| 145 | LOC657162    | NC_007417.3:4984251-4985436   | 657162    | 1,5-anhydro-D-fructose reductase                                      | 47.0419 | 23.8245 | 0.952528549 | 5.00E-05 | 0.00352415 |
| 146 | LOC103312668 | NC_007419.2:4994664-4995835   | 103312668 | hypothetical protein                                                  | 15.5251 | 7.86958 | 0.897721307 | 0.00045  | 0.0239168  |
| 147 | LOC654861    | NC_007418.3:20658743-20660124 | 654861    | iodotyrosine deiodinase 1                                             | 41.2268 | 20.9708 | 0.94257152  | 5.00E-05 | 0.00352415 |
| 148 | Ddc          | NC_007420.3:9022378-9028416   | 662962    | dopa decarboxylase                                                    | 16.3908 | 8.35231 | 0.894929643 | 5.00E-05 | 0.00352415 |
| 149 | LOC107398182 | NC_007422.5:3052401-3054328   | 107398182 | eukaryotic translation initiation factor 5B-like                      | 10.7208 | 5.46701 | 0.857900298 | 0.0011   | 0.0486442  |
| 150 | Chp          | NC_007417.3:8576783-8595515   | 652931    | cell surface protein chaoptin                                         | 28.493  | 14.546  | 0.923829158 | 5.00E-05 | 0.00352415 |
| 151 | LOC659062    | NC_007419.2:4066202-4071560   | 659062    | 1-phosphatidylinositol 4,5-bisphosphate phosphodiesterase             | 33.3892 | 17.0565 | 0.929437281 | 0.0003   | 0.0169681  |
| 152 | LOC661515    | NC_007422.5:8816451-8819563   | 661515    | elongation factor Tu                                                  | 143.833 | 74.13   | 0.946929349 | 0.0003   | 0.0169681  |
| 153 | LOC103314151 | NC_007418.3:31269917-31273035 | 103314151 | caspase-1-like                                                        | 59.0496 | 30.599  | 0.926275733 | 0.0007   | 0.0338289  |
| 154 | ImpL2        | NC_007421.3:8945769-8951756   | 657195    | ecdysone-inducible gene L2                                            | 79.4786 | 41.3323 | 0.926846333 | 5.00E-05 | 0.00352415 |
| 155 | LOC107398650 | NC_007424.3:9686219-9686420   | 107398650 | uncharacterized LOC107398650                                          | 2391.94 | 1250.67 | 0.934929974 | 5.00E-05 | 0.00352415 |
| 156 | LOC659093    | NC_007420.3:11252586-11253090 | 659093    | endocuticle structural glycoprotein SgAbd-5                           | 155.783 | 81.8622 | 0.919983107 | 5.00E-05 | 0.00352415 |
| 157 | LOC660041    | NC_007420.3:6044023-6045427   | 660041    | Krueppel-like factor 11                                               | 94.9095 | 49.9855 | 0.911586713 | 5.00E-05 | 0.00352415 |
| 158 | LOC658874    | NC_007421.3:219042-220468     | 658874    | alpha-tocopherol transfer protein-like                                | 30.6796 | 16.3686 | 0.867072649 | 5.00E-05 | 0.00352415 |
| 159 | LOC662648    | NC_007422.5:3574137-3575741   | 662648    | spermine oxidase                                                      | 24.9704 | 13.3882 | 0.851982116 | 5.00E-05 | 0.00352415 |
| 160 | LOC660047    | NC_007421.3:2374864-2375715   | 660047    | uncharacterized LOC660047                                             | 30.6459 | 16.4969 | 0.854919262 | 0.0006   | 0.0297494  |
| 161 | Nag2         | NC_007418.3:3684052-3691642   | 658249    | beta-N-acetylglucosaminidase NAG2                                     | 32.9775 | 17.8294 | 0.851592677 | 0.0003   | 0.0169681  |
| 162 | LOC662670    | NC_007419.2:8123700-8129243   | 662670    | aldose reductase                                                      | 111.568 | 60.7089 | 0.867246284 | 0.00015  | 0.00949185 |
| 163 | Pmp1-b       | NC_007421.3:3525434-3526482   | 659324    | peritrophic matrix protein 1-B                                        | 825.445 | 452.515 | 0.865768543 | 5.00E-05 | 0.00352415 |
| 164 | LOC656561    | NC_007422.5:4149292-4151763   | 656561    | mannose-1-phosphate guanylttransferase alpha-A                        | 62.6382 | 34.3436 | 0.848444034 | 5.00E-05 | 0.00352415 |
| 165 | numb         | NC_007424.3:6645097-6665968   | 661741    | protein numb                                                          | 24.382  | 13.3787 | 0.819872507 | 0.00105  | 0.0470692  |
| 166 | LOC657451    | NC_007425.3:5941152-5943554   | 657451    | UDP-glucuronosyltransferase 2B9                                       | 8.19401 | 4.50222 | 0.74068041  | 0.00065  | 0.0319518  |
| 167 | LOC661519    | NC_007424.3:3821084-3827221   | 661519    | facilitated trehalose transporter Tret1                               | 45.4659 | 25.0317 | 0.835902822 | 0.00035  | 0.0194127  |
| 168 | H111         | NC_007420.3:1439218-1441500   | 656711    | serine protease H111                                                  | 40.6491 | 22.5145 | 0.824734665 | 5.00E-05 | 0.00352415 |
| 169 | LOC103312286 | NC_007418.3:2817643-2821512   | 103312286 | lipopolysaccharide-induced tumor necrosis factor-alpha factor homolog | 168.014 | 93.2398 | 0.842734372 | 5.00E-05 | 0.00352415 |
| 170 | LOC659054    | NC_007420.3:1061308-1067260   | 659054    | cytochrome P450 345B1                                                 | 38.1201 | 21.2545 | 0.813812971 | 0.00095  | 0.0436105  |

|     |              |                               |           |                                                        |         |         |             |          |            |
|-----|--------------|-------------------------------|-----------|--------------------------------------------------------|---------|---------|-------------|----------|------------|
| 171 | LOC662035    | NC_007417.3:6104312-6109694   | 662035    | putative DNA helicase IN080                            | 301.729 | 168.42  | 0.837422691 | 0.00015  | 0.00949185 |
| 172 | LOC662543    | NC_007420.3:6797945-6806048   | 662543    | inter-alpha-trypsin inhibitor heavy chain H4           | 163.378 | 91.2198 | 0.833868783 | 0.0004   | 0.0218162  |
| 173 | LOC658613    | NC_007418.3:15582811-15592736 | 658613    | glycine dehydrogenase (decarboxylating), mitochondrial | 16.6143 | 9.27909 | 0.777034593 | 5.00E-05 | 0.00352415 |
| 174 | -            | NC_007418.3:15801610-15803677 | -         | -                                                      | 30.29   | 16.997  | 0.797945221 | 5.00E-05 | 0.00352415 |
| 175 | LOC656432    | NC_007420.3:9468571-9470736   | 656432    | beta-galactosidase-1-like protein 2                    | 117.96  | 66.2797 | 0.822233375 | 5.00E-05 | 0.00352415 |
| 176 | Pmp2-b       | NC_007418.3:635588-636266     | 662632    | peritrophic matrix protein 2-B                         | 1670.46 | 941.89  | 0.825947453 | 0.0002   | 0.0120247  |
| 177 | LOC100141952 | NC_007421.3:5176885-5186355   | 100141952 | uncharacterized LOC100141952                           | 47.4934 | 26.836  | 0.800836496 | 0.00085  | 0.0395751  |
| 178 | LOC664014    | NC_007419.2:3203324-3204205   | 664014    | uncharacterized LOC664014                              | 269.934 | 153.219 | 0.812960933 | 5.00E-05 | 0.00352415 |
| 179 | LOC662129    | NC_007422.5:3466594-3468311   | 662129    | alpha-N-acetylgalactosaminidase                        | 68.5845 | 39.3028 | 0.787885908 | 5.00E-05 | 0.00352415 |
| 180 | LOC655252    | NW_015450233.1:23600-25618    | 655252    | kynurenine--oxoglutarate transaminase 3                | 38.1793 | 21.9066 | 0.774328285 | 5.00E-05 | 0.00352415 |
| 181 | LOC663674    | NC_007418.3:1075965-1077185   | 663674    | uncharacterized LOC663674                              | 32.3425 | 18.5721 | 0.768563722 | 0.0001   | 0.00663971 |
| 182 | Th           | NC_007418.3:26517372-26538072 | 654918    | tyrosine hydroxylase                                   | 50.4661 | 29.0366 | 0.776900946 | 5.00E-05 | 0.00352415 |
| 183 | LOC103314048 | NC_007423.3:10035093-10036045 | 103314048 | uncharacterized LOC103314048                           | 94.2427 | 54.3629 | 0.782689004 | 0.0007   | 0.0338289  |
| 184 | LOC655368    | NC_007423.3:9698633-9699893   | 655368    | uncharacterized LOC655368                              | 80.429  | 46.8678 | 0.766487184 | 5.00E-05 | 0.00352415 |
| 185 | Csp12        | NC_007422.5:13945713-13946306 | 661270    | chemosensory protein 12                                | 1471.04 | 859.881 | 0.773931142 | 5.00E-05 | 0.00352415 |
| 186 | LOC663235    | NC_007422.5:3641055-3642362   | 663235    | hypothetical protein                                   | 93.6706 | 54.8118 | 0.76234629  | 5.00E-05 | 0.00352415 |
| 187 | LOC656567    | NC_007420.3:847715-857421     | 656567    | glutamate--cysteine ligase catalytic subunit           | 42.3195 | 25.0197 | 0.735412263 | 5.00E-05 | 0.00352415 |
| 188 | LOC103313530 | NC_007422.5:179815-186554     | 103313530 | uncharacterized LOC103313530                           | 64.7618 | 38.423  | 0.738212222 | 0.00035  | 0.0194127  |
| 189 | -            | NC_007424.3:4463016-4463934   | -         | -                                                      | 93.5573 | 55.5374 | 0.741983302 | 5.00E-05 | 0.00352415 |
| 190 | LOC657720    | NC_007419.2:3850272-3854338   | 657720    | open rectifier potassium channel protein 1             | 19.0301 | 11.3343 | 0.699493782 | 5.00E-05 | 0.00352415 |
| 191 | LOC100142298 | NC_007419.2:4301445-4302896   | 100142298 | uncharacterized LOC100142298                           | 47.5589 | 28.4957 | 0.719231093 | 0.0002   | 0.0120247  |
| 192 | LOC103313498 | NC_007422.5:1065067-1067009   | 103313498 | uncharacterized LOC103313498                           | 202.179 | 122.301 | 0.720566797 | 0.0001   | 0.00663971 |
| 193 | LOC661415    | NC_007419.2:63447-66167       | 661415    | nose resistant to fluoxetine protein 6-like            | 39.6411 | 24.1044 | 0.694999206 | 0.0001   | 0.00663971 |
| 194 | LOC657080    | NW_015450233.1:406664-408759  | 657080    | venom carboxylesterase-6                               | 93.183  | 57.0598 | 0.697927075 | 5.00E-05 | 0.00352415 |
| 195 | LOC664567    | NC_007422.5:9821196-9824417   | 664567    | beta-hexosaminidase subunit alpha                      | 104.754 | 64.2143 | 0.697451978 | 0.00015  | 0.00949185 |
| 196 | -            | NW_015450951.1:3564-4038      | -         | -                                                      | 2114.46 | 1298.4  | 0.703125797 | 0.00075  | 0.0357178  |
| 197 | LOC664439    | NC_007422.5:10416132-10418741 | 664439    | acyl-CoA synthetase family member 3, mitochondrial     | 50.4842 | 31.0425 | 0.684143038 | 0.0005   | 0.0259129  |
| 198 | -            | NW_015451782.1:48431-48717    | -         | -                                                      | 2002.84 | 1234.33 | 0.697870831 | 5.00E-05 | 0.00352415 |
| 199 | LOC656992    | NC_007424.3:5204660-5208030   | 656992    | 4-aminobutyrate aminotransferase, mitochondrial-like   | 67.1836 | 41.4988 | 0.682002668 | 5.00E-05 | 0.00352415 |
| 200 | -            | NW_015451463.1:1816-2091      | -         | -                                                      | 2040.91 | 1263.34 | 0.691534801 | 5.00E-05 | 0.00352415 |
| 201 | Nat          | NC_007419.2:6607412-6617811   | 664229    | dopamine N acetyltransferase                           | 213.457 | 133.072 | 0.677680435 | 0.00055  | 0.0281853  |
| 202 | LOC655942    | NC_007421.3:2045203-2047987   | 655942    | protein GUCD1                                          | 53.3453 | 33.2693 | 0.665238548 | 0.0011   | 0.0486442  |
| 203 | LOC655491    | NC_007417.3:3288378-3296663   | 655491    | tubulin alpha 1-like protein                           | 77.6973 | 48.5684 | 0.666893448 | 0.00035  | 0.0194127  |
| 204 | -            | NW_015451371.1:7855-8898      | -         | -                                                      | 752.714 | 472.036 | 0.672067208 | 0.0008   | 0.037707   |
| 205 | LOC662761    | NC_007418.3:687991-691412     | 662761    | adenosine deaminase CECR1                              | 89.3882 | 56.0948 | 0.662775088 | 0.0003   | 0.0169681  |
| 206 | LOC664154    | NC_007417.3:7763122-7780118   | 664154    | uncharacterized LOC664154                              | 89.2228 | 56.2431 | 0.656390256 | 0.0006   | 0.0297494  |
| 207 | -            | NC_007424.3:14489446-14491160 | -         | -                                                      | 60.6251 | 38.6516 | 0.636139001 | 0.0006   | 0.0297494  |
| 208 | LOC659321    | NC_007420.3:12620445-12623447 | 659321    | tyrosine aminotransferase                              | 206.15  | 131.495 | 0.644737903 | 0.0005   | 0.0259129  |
| 209 | LOC100142601 | NC_007419.2:1397019-1402677   | 100142601 | phosphoribosylformylglycinamide synthase               | 42.277  | 27.1392 | 0.621019181 | 0.0011   | 0.0486442  |
| 210 | LOC660688    | NW_015451036.1:167479-175442  | 660688    | proline-rich extensin-like protein EPR1                | 27.6115 | 17.7787 | 0.607497943 | 0.0007   | 0.0338289  |
| 211 | Arr1         | NC_007420.3:3790766-3798103   | 657618    | arrestin 1                                             | 73.5273 | 47.3804 | 0.623346297 | 0.0005   | 0.0259129  |
| 212 | LOC661336    | NC_007422.5:3353677-3363322   | 661336    | neuroendocrine convertase 2                            | 58.8818 | 37.9922 | 0.618932032 | 0.0005   | 0.0259129  |
| 213 | LOC103314006 | NC_007423.3:11127895-11132433 | 103314006 | prohormone-2                                           | 217.74  | 142.182 | 0.611366927 | 0.00075  | 0.0357178  |
| 214 | LOC654884    | NC_007422.5:7976218-7984456   | 654884    | abhydrolase domain-containing protein 2                | 119.821 | 78.4816 | 0.604178412 | 0.00045  | 0.0239168  |

|     |               |                               |           |                                                                       |         |         |              |          |            |
|-----|---------------|-------------------------------|-----------|-----------------------------------------------------------------------|---------|---------|--------------|----------|------------|
| 215 | LOC655020     | NC_007422.5:4256193-4265582   | 655020    | protein phosphatase 1A                                                | 69.9566 | 104.739 | -0.575498801 | 0.00065  | 0.0319518  |
| 216 | Toll3         | NC_007417.3:4930716-4940271   | 656158    | toll-like receptor 3                                                  | 16.4606 | 24.6816 | -0.556631952 | 0.001    | 0.0455408  |
| 217 | LOC663635     | NC_007420.3:9273120-9279317   | 663635    | sterol regulatory element-binding protein cleavage-activating protein | 15.2285 | 23.1091 | -0.571048138 | 0.0004   | 0.0218162  |
| 218 | LOC660224     | NC_007418.3:258591-259603     | 660224    | rhythmically expressed gene 2 protein                                 | 96.9004 | 149.441 | -0.619811142 | 0.0004   | 0.0218162  |
| 219 | LOC657042     | NC_007423.3:13439529-13441914 | 657042    | nucleolar complex protein 2 homolog                                   | 14.6192 | 22.8659 | -0.611630181 | 0.00055  | 0.0281853  |
| 220 | LOC661892     | NC_007422.5:12270478-12278083 | 661892    | protein SOX-15                                                        | 23.0709 | 36.1888 | -0.627578112 | 0.00085  | 0.0395751  |
| 221 | LOC658340     | NC_007418.3:53870-59915       | 658340    | UNC93-like protein MFSD11                                             | 58.2738 | 91.467  | -0.641544032 | 0.00075  | 0.0357178  |
| 222 | LOC663003     | NC_007424.3:11843371-11846305 | 663003    | uncharacterized LOC663003                                             | 12.6591 | 19.9564 | -0.617528477 | 0.0006   | 0.0297494  |
| 223 | LOC660215     | NC_007416.3:4422796-4423566   | 660215    | uncharacterized LOC660215                                             | 127.291 | 200.828 | -0.653706372 | 0.0002   | 0.0120247  |
| 224 | LOC659000     | NC_007418.3:5146248-5148473   | 659000    | protein SDA1 homolog                                                  | 10.3984 | 16.4573 | -0.614999118 | 0.001    | 0.0455408  |
| 225 | LOC100142105  | NC_007421.3:4278613-4281820   | 100142105 | brain protein I3                                                      | 99.6908 | 157.785 | -0.657142759 | 0.0005   | 0.0259129  |
| 226 | Cyp346a2      | NC_007420.3:9730439-9732117   | 657412    | cytochrome P450 346A2                                                 | 30.9659 | 49.0199 | -0.64596846  | 0.00025  | 0.014684   |
| 227 | LOC661684     | NC_007421.3:775511-777185     | 661684    | short-chain specific acyl-CoA dehydrogenase, mitochondrial            | 24.5462 | 39.0937 | -0.650266855 | 0.0003   | 0.0169681  |
| 228 | LOC662326     | NC_007417.3:14939348-14943419 | 662326    | heat shock 70 kDa protein cognate 2                                   | 26.859  | 42.7952 | -0.652629284 | 0.0002   | 0.0120247  |
| 229 | Csp18         | NC_007422.5:13932549-13933016 | 661601    | chemosensory protein 18                                               | 465.515 | 741.726 | -0.670906613 | 0.00025  | 0.014684   |
| 230 | LOC660592     | NC_007418.3:10096889-10113150 | 660592    | N-acetylgalactosamine kinase                                          | 31.6173 | 50.5195 | -0.659481229 | 5.00E-05 | 0.00352415 |
| 231 | LOC658388     | NW_015450712.1:76662-78322    | 658388    | cytochrome P450 6BR1                                                  | 16.0028 | 25.6226 | -0.646879127 | 0.0005   | 0.0259129  |
| 232 | LOC662079     | NC_007419.2:2625995-2631595   | 662079    | hypothetical protein                                                  | 19.6107 | 31.4021 | -0.652693814 | 0.00025  | 0.014684   |
| 233 | LOC662383     | NC_007423.3:4119857-4126194   | 662383    | protein msta, isoform B                                               | 15.1998 | 24.5617 | -0.658007785 | 0.00045  | 0.0239168  |
| 234 | LOC659207     | NC_007417.3:45734-68728       | 659207    | transferrin                                                           | 17.6007 | 28.4732 | -0.664046792 | 0.00105  | 0.0470692  |
| 235 | LOC655313     | NC_007416.3:3756168-3765231   | 655313    | semaphorin-5A                                                         | 28.2365 | 45.6881 | -0.675284267 | 0.00025  | 0.014684   |
| 236 | LOC655245     | NC_007423.3:167402-169487     | 655245    | aldehyde dehydrogenase, dimeric NADP-preferring                       | 36.2413 | 58.7413 | -0.681825197 | 5.00E-05 | 0.00352415 |
| 237 | LOC103313009  | NC_007417.3:1760229-1763825   | 103313009 | uncharacterized LOC103313009                                          | 154.96  | 251.789 | -0.696757627 | 0.00055  | 0.0281853  |
| 238 | LOC655423     | NC_007418.3:1146005-1147378   | 655423    | alpha-tocopherol transfer protein-like                                | 38.3678 | 62.546  | -0.690785223 | 0.0002   | 0.0120247  |
| 239 | SA; stromalin | NC_007420.3:9385414-9389924   | 655276    | cohesin subunit SA-1                                                  | 8.52965 | 13.9946 | -0.653947903 | 5.00E-05 | 0.00352415 |
| 240 | LOC656104     | NC_007421.3:63465-71878       | 656104    | T-complex protein 1 subunit zeta                                      | 47.4364 | 77.8406 | -0.702847114 | 0.0001   | 0.00663971 |
| 241 | LOC659785     | NC_007422.5:6522954-6527857   | 659785    | probable cleavage and polyadenylation specificity factor subunit 2    | 10.3888 | 17.0823 | -0.666962452 | 0.0002   | 0.0120247  |
| 242 | LOC103314479  | NC_007425.3:6234058-6237814   | 103314479 | uncharacterized LOC103314479                                          | 7.33904 | 12.1694 | -0.659236404 | 0.00035  | 0.0194127  |
| 243 | LOC664562     | NC_007422.5:9833967-9838122   | 664562    | glucosylceramidase                                                    | 41.8783 | 69.5296 | -0.717981149 | 5.00E-05 | 0.00352415 |
| 244 | LOC655815     | NC_007418.3:3583259-3591506   | 655815    | protein BTG1                                                          | 64.3603 | 106.898 | -0.723181613 | 0.0001   | 0.00663971 |
| 245 | LOC656298     | NC_007418.3:14512305-14528095 | 656298    | annexin B9                                                            | 71.0097 | 118.087 | -0.72575277  | 0.0009   | 0.0416491  |
| 246 | LOC103314187  | NW_015450232.1:77786-80988    | 103314187 | serine protease snake                                                 | 29.4396 | 49.0301 | -0.716846935 | 0.0008   | 0.037707   |
| 247 | LOC103312942  | NC_007420.3:4705674-4708861   | 103312942 | uncharacterized LOC103312942                                          | 22.5772 | 37.6704 | -0.713837292 | 0.0001   | 0.00663971 |
| 248 | LOC659195     | NC_007424.3:286609-287649     | 659195    | troponin C, isoform 1                                                 | 315.193 | 527.319 | -0.740603866 | 5.00E-05 | 0.00352415 |
| 249 | LOC657335     | NC_007420.3:8152126-8155578   | 657335    | sulfotransferase family cytosolic 1B member 1                         | 61.3575 | 102.723 | -0.734100845 | 5.00E-05 | 0.00352415 |
| 250 | ML1           | NC_007419.2:6588287-6589812   | 664531    | MD2-like 1                                                            | 278.172 | 465.905 | -0.741974787 | 5.00E-05 | 0.00352415 |
| 251 | LOC658084     | NC_007418.3:3667009-3673954   | 658084    | palmitoyl-protein thioesterase 1                                      | 14.1859 | 23.9438 | -0.715948853 | 0.00015  | 0.00949185 |
| 252 | LOC663261     | NC_007424.3:12139213-12141584 | 663261    | probable 28S rRNA (cytosine-C(5))-methyltransferase                   | 8.46807 | 14.3689 | -0.698871633 | 5.00E-05 | 0.00352415 |
| 253 | LOC662530     | NW_015450798.1:17423-18657    | 662530    | transmembrane emp24 domain-containing protein bai                     | 55.0696 | 93.5047 | -0.753167303 | 5.00E-05 | 0.00352415 |
| 254 | LOC661450     | NC_007416.3:7275308-7297021   | 661450    | solute carrier organic anion transporter family member 5A1            | 9.40076 | 16.0085 | -0.709566961 | 0.0011   | 0.0486442  |
| 255 | rad50         | NC_007421.3:3442759-3447047   | 658288    | rad50                                                                 | 2.10939 | 3.59625 | -0.563825691 | 0.0011   | 0.0486442  |
| 256 | LOC655289     | NC_007422.5:1759507-1765805   | 655289    | pentatricopeptide repeat-containing protein 2, mitochondrial          | 15.7703 | 26.9391 | -0.736377051 | 0.00025  | 0.014684   |
| 257 | Gr106         | NC_007420.3:8958318-8966093   | 662798    | glucose transporter                                                   | 30.0719 | 51.4642 | -0.755722844 | 0.0007   | 0.0338289  |
| 258 | LOC100142097  | NC_007423.3:11760941-11761714 | 100142097 | uncharacterized LOC100142097                                          | 278.576 | 478.021 | -0.776848385 | 5.00E-05 | 0.00352415 |

|     |              |                               |           |                                                                          |         |         |              |          |            |
|-----|--------------|-------------------------------|-----------|--------------------------------------------------------------------------|---------|---------|--------------|----------|------------|
| 259 | LOC655370    | NC_007421.3:3124430-3133836   | 655370    | uncharacterized LOC655370                                                | 14.7297 | 25.278  | -0.740364322 | 5.00E-05 | 0.00352415 |
| 260 | LOC107399196 | NW_015452199.1:1353-2623      | 107399196 | uncharacterized LOC107399196                                             | 46.882  | 80.7461 | -0.771666489 | 5.00E-05 | 0.00352415 |
| 261 | LOC656820    | NC_007422.5:5375003-5382661   | 656820    | C-1-tetrahydrofolate synthase, cytoplasmic                               | 55.3313 | 95.3973 | -0.775055972 | 5.00E-05 | 0.00352415 |
| 262 | LOC662773    | NC_007422.5:489656-490132     | 662773    | tenecin-3                                                                | 296.209 | 514.945 | -0.795739478 | 5.00E-05 | 0.00352415 |
| 263 | LOC103314922 | NC_007420.3:7395440-7396587   | 103314922 | uncharacterized LOC103314922                                             | 23.4531 | 40.9041 | -0.777074036 | 0.00075  | 0.0357178  |
| 264 | LOC103313789 | NC_007423.3:3817639-3826196   | 103313789 | uncharacterized LOC103313789                                             | 14.0284 | 24.5514 | -0.76571092  | 5.00E-05 | 0.00352415 |
| 265 | LOC655860    | NC_007420.3:14729016-14731204 | 655860    | nucleolar GTP-binding protein 2                                          | 9.25317 | 16.2081 | -0.747017793 | 0.0001   | 0.00663971 |
| 266 | LOC100142246 | NC_007417.3:12105006-12111871 | 100142246 | transmembrane protease serine 9                                          | 36.7111 | 64.7702 | -0.802444824 | 0.00045  | 0.0239168  |
| 267 | LOC659445    | NC_007418.3:128530-136783     | 659445    | importin-7                                                               | 23.1932 | 40.9247 | -0.793198855 | 0.0007   | 0.0338289  |
| 268 | daw: Alp23B  | NW_015451971.1:37267-41548    | 658911    | dawdle                                                                   | 6.97833 | 12.3159 | -0.738991239 | 0.0006   | 0.0297494  |
| 269 | LOC663832    | NC_007422.5:11420618-11426051 | 663832    | aspartic proteinase A2                                                   | 139.137 | 245.703 | -0.815937342 | 5.00E-05 | 0.00352415 |
| 270 | LOC659989    | NC_007421.3:8060009-8076166   | 659989    | zinc carboxypeptidase                                                    | 50.6973 | 89.5994 | -0.809412561 | 0.0003   | 0.0169681  |
| 271 | LOC664209    | NC_007423.3:9067215-9069530   | 664209    | uncharacterized LOC664209                                                | 155.437 | 275.543 | -0.821922049 | 5.00E-05 | 0.00352415 |
| 272 | Tcas29desA   | NC_007425.3:6773285-6786677   | 658103    | Z9 acyl-CoA desaturase A                                                 | 156.491 | 277.739 | -0.823645486 | 0.00075  | 0.0357178  |
| 273 | serpin24     | NC_007423.3:5884658-5886989   | 662831    | serpin peptidase inhibitor 24                                            | 18.4766 | 32.9658 | -0.802340984 | 5.00E-05 | 0.00352415 |
| 274 | ML5          | NC_007422.5:6846774-6848499   | 656806    | MD2-like 5                                                               | 129.41  | 231.391 | -0.833498696 | 5.00E-05 | 0.00352415 |
| 275 | LOC100142066 | NC_007417.3:2909684-2920265   | 100142066 | uncharacterized LOC100142066                                             | 9.68944 | 17.3362 | -0.77850841  | 0.0008   | 0.037707   |
| 276 | LOC658596    | NC_007422.5:8324494-8335126   | 658596    | nuclear pore membrane glycoprotein 210                                   | 3.43892 | 6.1997  | -0.697728085 | 5.00E-05 | 0.00352415 |
| 277 | LOC655281    | NC_007423.3:9702093-9703508   | 655281    | uncharacterized LOC655281                                                | 40.9712 | 73.9293 | -0.836130262 | 5.00E-05 | 0.00352415 |
| 278 | LOC663867    | NC_007422.5:13157788-13158793 | 663867    | proteasome subunit beta type-4                                           | 68.3952 | 123.59  | -0.844280496 | 5.00E-05 | 0.00352415 |
| 279 | LOC659791    | NC_007421.3:5616218-5655473   | 659791    | alpha-tocopherol transfer protein-like                                   | 30.1196 | 54.4762 | -0.834045453 | 0.00025  | 0.014684   |
| 280 | LOC658566    | NC_007418.3:1393517-1395804   | 658566    | 4-coumarate--CoA ligase 1                                                | 43.6587 | 79.3134 | -0.846699461 | 0.0008   | 0.037707   |
| 281 | LOC103313132 | NC_007422.5:5992519-6006521   | 103313132 | uncharacterized LOC103313132                                             | 4.59717 | 8.36909 | -0.743211362 | 0.00015  | 0.00949185 |
| 282 | -            | NC_007422.5:8836159-8837521   | -         | -                                                                        | 34.3424 | 62.6722 | -0.849263601 | 5.00E-05 | 0.00352415 |
| 283 | LOC658982    | NW_015451959.1:3177-5999      | 658982    | periodic tryptophan protein 2 homolog                                    | 4.2268  | 7.73082 | -0.740189202 | 0.0006   | 0.0297494  |
| 284 | LOC656402    | NC_007416.3:105572-111276     | 656402    | glycogenin-2                                                             | 92.1874 | 168.819 | -0.865791078 | 5.00E-05 | 0.00352415 |
| 285 | LOC661235    | NC_007418.3:18833724-18842456 | 661235    | pre-rRNA-processing protein TSR1 homolog                                 | 8.42663 | 15.4628 | -0.804395723 | 0.00045  | 0.0239168  |
| 286 | LanA         | NC_007418.3:5388902-5421238   | 661583    | laminin subunit alpha                                                    | 2.05359 | 3.7765  | -0.645447498 | 0.00075  | 0.0357178  |
| 287 | Y-1          | NC_007423.3:13098920-13102773 | 662975    | yellow-1                                                                 | 35.6633 | 65.5874 | -0.860912563 | 5.00E-05 | 0.00352415 |
| 288 | LOC663110    | NC_007424.3:4101781-4102842   | 663110    | protein BCCIP homolog                                                    | 17.0472 | 31.4301 | -0.84555845  | 0.0001   | 0.00663971 |
| 289 | LOC655179    | NC_007417.3:10821015-10824320 | 655179    | WD repeat-containing protein 36                                          | 2.73119 | 5.0532  | -0.698062192 | 0.0006   | 0.0297494  |
| 290 | LOC658565    | NC_007418.3:60561-75519       | 658565    | arf-GAP with Rho-GAP domain, ANK repeat and PH domain-containing protein | 16.2619 | 30.1676 | -0.852455798 | 0.0007   | 0.0338289  |
| 291 | LOC103313795 | NC_007423.3:4191208-4197137   | 103313795 | hypothetical protein                                                     | 10.5553 | 19.876  | -0.853290591 | 0.0003   | 0.0169681  |
| 292 | P37          | NC_007418.3:11916031-11923284 | 655840    | serine protease P37                                                      | 107.295 | 202.289 | -0.908565518 | 5.00E-05 | 0.00352415 |
| 293 | LOC657463    | NC_007416.3:28041-32308       | 657463    | sarcalumenin                                                             | 68.0665 | 128.393 | -0.905701551 | 5.00E-05 | 0.00352415 |
| 294 | Cda8         | NC_007420.3:6638235-6639855   | 662008    | chitin deacetylase 8                                                     | 102.165 | 192.787 | -0.909518191 | 0.0004   | 0.0218162  |
| 295 | Cyp4q1       | NC_007424.3:9524439-9526264   | 659878    | cytochrome P450 monooxygenase CYP4Q1                                     | 26.2928 | 49.7315 | -0.894361408 | 5.00E-05 | 0.00352415 |
| 296 | LOC663981    | NC_007417.3:12412614-12414764 | 663981    | epoxide hydrolase 4                                                      | 5.29294 | 10.0192 | -0.808213395 | 0.0002   | 0.0120247  |
| 297 | LOC103314725 | NW_015450989.1:282168-320687  | 103314725 | eIF-2-alpha kinase activator GCN1                                        | 4.28045 | 8.13035 | -0.790009284 | 0.00015  | 0.00949185 |
| 298 | LOC103313111 | NC_007420.3:9088174-9097602   | 103313111 | collagen alpha-2(IV) chain                                               | 5.6274  | 10.691  | -0.818883436 | 5.00E-05 | 0.00352415 |
| 299 | LOC664288    | NC_007419.2:9234736-9243034   | 664288    | leucine--tRNA ligase, cytoplasmic                                        | 9.63733 | 18.3311 | -0.861787658 | 0.0002   | 0.0120247  |
| 300 | LOC103312937 | NC_007420.3:4528636-4530444   | 103312937 | sodium/potassium-transporting ATPase subunit beta-2                      | 10.175  | 19.4098 | -0.868987214 | 5.00E-05 | 0.00352415 |
| 301 | LOC659823    | NW_015452129.1:9-1304         | 659823    | pescadillo homolog                                                       | 10.3673 | 19.8592 | -0.875794207 | 5.00E-05 | 0.00352415 |
| 302 | LOC103312293 | NC_007418.3:4255638-4262123   | 103312293 | paramyosin                                                               | 3.87539 | 7.4255  | -0.789244674 | 0.0004   | 0.0218162  |

|     |              |                               |           |                                                                 |         |         |              |          |            |
|-----|--------------|-------------------------------|-----------|-----------------------------------------------------------------|---------|---------|--------------|----------|------------|
| 303 | LOC655207    | NC_007421.3:2015475-2022700   | 655207    | carboxypeptidase D                                              | 87.7883 | 168.364 | -0.931685764 | 0.0006   | 0.0297494  |
| 304 | LOC664364    | NC_007417.3:8617585-8620167   | 664364    | SPARC                                                           | 54.3415 | 104.505 | -0.930877718 | 5.00E-05 | 0.00352415 |
| 305 | MRP          | NC_007421.3:188314-195426     | 658210    | probable multidrug resistance-associated protein lethal(2)O3659 | 4.32175 | 8.32368 | -0.808998752 | 5.00E-05 | 0.00352415 |
| 306 | LOC661092    | NC_007417.3:13240881-13248493 | 661092    | sodium/potassium-transporting ATPase subunit alpha              | 5.26452 | 10.1432 | -0.830887715 | 5.00E-05 | 0.00352415 |
| 307 | LOC662517    | NC_007422.5:13780430-13781456 | 662517    | deoxyuridine 5'-triphosphate nucleotidohydrolase                | 11.6912 | 22.5925 | -0.894499815 | 0.0002   | 0.0120247  |
| 308 | LOC656355    | NC_007420.3:14744243-14746019 | 656355    | regucalcin                                                      | 32.7036 | 63.4655 | -0.935624581 | 5.00E-05 | 0.00352415 |
| 309 | P139; P138   | NC_007422.5:6041473-6047386   | 661211    | serine protease easter                                          | 9.55014 | 18.5341 | -0.888732644 | 0.0002   | 0.0120247  |
| 310 | LOC103313602 | NC_007422.5:4646200-4647370   | 103313602 | hypothetical protein                                            | 11.003  | 21.3714 | -0.898260508 | 0.0001   | 0.00663971 |
| 311 | LOC659125    | NC_007420.3:1867701-1875585   | 659125    | dual specificity protein phosphatase 14                         | 12.5696 | 24.4162 | -0.905370154 | 5.00E-05 | 0.00352415 |
| 312 | LOC661261    | NC_007420.3:10014458-10017089 | 661261    | major facilitator superfamily domain-containing protein 1       | 10.259  | 20.0683 | -0.903995212 | 5.00E-05 | 0.00352415 |
| 313 | LOC663579    | NC_007418.3:5980961-5982150   | 663579    | zinc transporter ZIP1                                           | 20.6991 | 40.6013 | -0.938993406 | 5.00E-05 | 0.00352415 |
| 314 | LOC662498    | NW_015450798.1:3368-13812     | 662498    | senecionine N-oxygenase                                         | 61.9099 | 121.642 | -0.963094155 | 5.00E-05 | 0.00352415 |
| 315 | Z9desB       | NW_015450728.1:196850-224677  | 657939    | Z9 acyl-CoA desaturase B                                        | 73.9655 | 145.53  | -0.966897359 | 0.00015  | 0.00949185 |
| 316 | P92; P93     | NC_007422.5:6573192-6575140   | 661472    | serine protease P93                                             | 13.7271 | 27.1151 | -0.93287181  | 5.00E-05 | 0.00352415 |
| 317 | LOC656462    | NC_007420.3:1368354-1389670   | 656462    | pre-mRNA-splicing factor SYF1                                   | 4.82646 | 9.55406 | -0.857106578 | 5.00E-05 | 0.00352415 |
| 318 | LOC664474    | NC_007422.5:10079316-10081020 | 664474    | UDP-glucuronosyltransferase 2B20                                | 12.8205 | 25.4082 | -0.934176159 | 5.00E-05 | 0.00352415 |
| 319 | LOC103313053 | NC_007420.3:9479790-9480417   | 103313053 | SH3 domain-binding glutamic acid-rich protein homolog           | 25.7716 | 51.1543 | -0.962082841 | 0.00015  | 0.00949185 |
| 320 | LOC654859    | NC_007418.3:11533159-11608989 | 654859    | muscle M-line assembly protein unc-89                           | 36.3333 | 72.3594 | -0.974518801 | 0.001    | 0.0455408  |
| 321 | LOC656773    | NC_007422.5:15123328-15125176 | 656773    | 3-ketoacyl-CoA thiolase, mitochondrial                          | 164.065 | 327.018 | -0.990740738 | 5.00E-05 | 0.00352415 |
| 322 | LOC660518    | NC_007419.2:4402949-4411547   | 660518    | lipid storage droplets surface-binding protein 1                | 105.807 | 212.716 | -1.000688718 | 5.00E-05 | 0.00352415 |
| 323 | LOC659539    | NC_007424.3:3531789-3552125   | 659539    | uncharacterized LOC659539                                       | 31.3014 | 63.0919 | -0.988545344 | 0.00105  | 0.0470692  |
| 324 | LOC103314059 | NC_007423.3:10651203-10704793 | 103314059 | kielin/chordin-like protein                                     | 274.069 | 552.789 | -1.009542839 | 5.00E-05 | 0.00352415 |
| 325 | LOC657196    | NC_007422.5:15087077-15087895 | 657196    | protein lethal(2)essential for life                             | 519.507 | 1050.88 | -1.014980659 | 5.00E-05 | 0.00352415 |
| 326 | LOC660270    | NC_007420.3:7399862-7401745   | 660270    | cytochrome P450-like protein                                    | 32.4981 | 65.783  | -0.995401634 | 0.0002   | 0.0120247  |
| 327 | LOC662842    | NC_007419.2:738655-740578     | 662842    | putative N-acetylglucosamine-6-phosphate deacetylase            | 7.08987 | 14.3685 | -0.925787937 | 0.0005   | 0.0259129  |
| 328 | -            | NC_007418.3:27029845-27031125 | -         | -                                                               | 23.2188 | 47.4103 | -0.999186651 | 5.00E-05 | 0.00352415 |
| 329 | H4           | NC_007417.3:14188598-14191578 | 656917    | trypsin alpha/beta-1                                            | 44.4942 | 91.0483 | -1.016708448 | 5.00E-05 | 0.00352415 |
| 330 | LOC654972    | NC_007418.3:4222749-4228897   | 654972    | ethanolamine-phosphate cytidylyltransferase                     | 54.4605 | 111.825 | -1.02455425  | 5.00E-05 | 0.00352415 |
| 331 | LOC655556    | NC_007418.3:11362444-11392799 | 655556    | uncharacterized LOC655556                                       | 8.09174 | 16.6392 | -0.956156799 | 5.00E-05 | 0.00352415 |
| 332 | LOC100142446 | NC_007423.3:13691816-13693879 | 100142446 | kynurenine formamidase                                          | 24.5497 | 50.669  | -1.015992611 | 5.00E-05 | 0.00352415 |
| 333 | LOC657487    | NC_007419.2:7211929-7212896   | 657487    | uncharacterized LOC657487                                       | 8.07788 | 16.678  | -0.961527742 | 0.00045  | 0.0239168  |
| 334 | LOC103312884 | NC_007421.3:4556300-4556688   | 103312884 | putative uncharacterized protein DDB_G0287191                   | 240.839 | 498.324 | -1.045929333 | 5.00E-05 | 0.00352415 |
| 335 | LOC659994    | NC_007422.5:2209826-2213027   | 659994    | RNA-binding protein pno1                                        | 39.9515 | 83.4204 | -1.043675368 | 5.00E-05 | 0.00352415 |
| 336 | LOC663195    | NC_007418.3:793895-802728     | 663195    | facilitated trehalose transporter Tret1                         | 21.8349 | 45.7542 | -1.033855498 | 5.00E-05 | 0.00352415 |
| 337 | LOC658429    | NC_007420.3:12101216-12111276 | 658429    | transcription factor MafA                                       | 12.5793 | 26.3728 | -1.011333905 | 5.00E-05 | 0.00352415 |
| 338 | LOC659008    | NC_007420.3:318605-330134     | 659008    | protein takeout-like                                            | 15.3669 | 32.4941 | -1.033125895 | 5.00E-05 | 0.00352415 |
| 339 | LOC656237    | NC_007416.3:1719129-1738731   | 656237    | lipoyltransferase 1, mitochondrial                              | 210.763 | 445.863 | -1.077382057 | 0.0006   | 0.0297494  |
| 340 | LOC103314203 | NC_007424.3:6233088-6233823   | 103314203 | ARL14 effector protein                                          | 9.9784  | 21.1327 | -1.011511648 | 0.0002   | 0.0120247  |
| 341 | Cyp4q2       | NC_007424.3:9520015-9523792   | 659810    | cytochrome P450 monooxygenase CYP4Q2                            | 29.3936 | 62.3018 | -1.058478957 | 0.00015  | 0.00949185 |
| 342 | LOC659452    | NC_007418.3:29326638-29443297 | 659452    | FH1/FH2 domain-containing protein 3                             | 55.2307 | 117.25  | -1.072410272 | 0.0006   | 0.0297494  |
| 343 | LOC663372    | NC_007422.5:3665128-3686283   | 663372    | dystroglycan                                                    | 16.2427 | 34.5167 | -1.04251184  | 5.00E-05 | 0.00352415 |
| 344 | -            | NW_015450261.1:0-2084         | -         | -                                                               | 28.3137 | 60.468  | -1.068260467 | 5.00E-05 | 0.00352415 |
| 345 | LOC663877    | NC_007419.2:8872422-8873190   | 663877    | muscle-specific protein 20                                      | 1690.09 | 3620.88 | -1.098785306 | 0.0001   | 0.00663971 |
| 346 | LOC100141856 | NC_007418.3:15539663-15540377 | 100141856 | uncharacterized LOC100141856                                    | 121.382 | 260.053 | -1.092951357 | 5.00E-05 | 0.00352415 |



|     |                   |                               |           |                                                              |          |         |              |          |            |
|-----|-------------------|-------------------------------|-----------|--------------------------------------------------------------|----------|---------|--------------|----------|------------|
| 347 | LOC658250         | NC_007416.3:505213-512474     | 658250    | solute carrier family 41 member 1                            | 4.43005  | 9.4958  | -0.950774747 | 0.0003   | 0.0169681  |
| 348 | LOC663650         | NC_007418.3:6004785-6013734   | 663650    | NFX1-type zinc finger-containing protein 1                   | 11.8215  | 25.394  | -1.041644953 | 5.00E-05 | 0.00352415 |
| 349 | LOC103312157      | NW_015452154.1:11769-15913    | 103312157 | uncharacterized LOC103312157                                 | 14.2394  | 30.6539 | -1.054577159 | 5.00E-05 | 0.00352415 |
| 350 | LOC103312427      | NC_007418.3:17580840-17588533 | 103312427 | leucine-rich repeat-containing protein 15-like               | 26.5893  | 57.9561 | -1.095532239 | 0.0011   | 0.0486442  |
| 351 | -                 | NC_007423.3:12240617-12241207 | -         | -                                                            | 33.8376  | 74.7594 | -1.120779666 | 0.0001   | 0.00663971 |
| 352 | LOC664529         | NC_007422.5:9910444-9916586   | 664529    | patj homolog                                                 | 11.0615  | 24.5978 | -1.085610488 | 5.00E-05 | 0.00352415 |
| 353 | LOC655659         | NW_015450233.1:53802-55347    | 655659    | argininosuccinate synthase                                   | 16.9206  | 37.85   | -1.116295658 | 5.00E-05 | 0.00352415 |
| 354 | LOC662294         | NC_007419.2:10755792-10761211 | 662294    | ATP-binding cassette sub-family G member 1                   | 71.9715  | 161.29  | -1.153169091 | 5.00E-05 | 0.00352415 |
| 355 | LOC656717         | NC_007416.3:6224002-6240493   | 656717    | Down syndrome cell adhesion molecule-like protein Dscam2     | 6.01681  | 13.4979 | -1.04695674  | 5.00E-05 | 0.00352415 |
| 356 | LOC660984         | NC_007419.2:7653637-7656654   | 660984    | leucine-rich repeat-containing protein 15                    | 9.43468  | 21.1871 | -1.088334752 | 5.00E-05 | 0.00352415 |
| 357 | LOC103312995      | NC_007420.3:6444194-6447050   | 103312995 | cubilin                                                      | 1.2824   | 2.92468 | -0.782023376 | 0.0005   | 0.0259129  |
| 358 | LOC103314029      | NC_007423.3:11763948-11764598 | 103314029 | uncharacterized LOC103314029                                 | 23.496   | 53.7601 | -1.160578893 | 5.00E-05 | 0.00352415 |
| 359 | Ypflb; Irbp; Ku70 | NC_007422.5:11080951-11082768 | 664190    | inverted repeat-binding protein                              | 7.37564  | 16.8851 | -1.094486846 | 5.00E-05 | 0.00352415 |
| 360 | LOC659631         | NC_007417.3:11262009-11264896 | 659631    | adhesive plaque matrix protein                               | 19.8789  | 45.5555 | -1.15690591  | 5.00E-05 | 0.00352415 |
| 361 | LOC660368         | NC_007422.5:1063298-1064687   | 660368    | cathepsin L precursor                                        | 566.947  | 1307.57 | -1.20416289  | 5.00E-05 | 0.00352415 |
| 362 | LOC656478         | NW_015450245.1:57584-72054    | 656478    | acyl-CoA Delta(11) desaturase-like                           | 9.9233   | 23.1562 | -1.144984753 | 0.00095  | 0.0436105  |
| 363 | LOC663738         | NC_007417.3:12312221-12313397 | 663738    | protein takeout                                              | 12.4889  | 29.3171 | -1.168359055 | 5.00E-05 | 0.00352415 |
| 364 | VTGI              | NC_007425.3:2112481-2114171   | 656735    | pancreatic triacylglycerol lipase                            | 9.24748  | 22.022  | -1.167743997 | 5.00E-05 | 0.00352415 |
| 365 | LOC103314140      | NC_007418.3:31227375-31227927 | 103314140 | hypothetical protein                                         | 216.275  | 517.423 | -1.25460754  | 5.00E-05 | 0.00352415 |
| 366 | LOC660815         | NC_007418.3:1970626-2018832   | 660815    | tyrosine-protein kinase-like otk                             | 1.99625  | 4.78198 | -0.948405615 | 5.00E-05 | 0.00352415 |
| 367 | LOC655472         | NC_007425.3:1346023-1347021   | 655472    | protein takeout                                              | 74.3584  | 179.316 | -1.258687178 | 5.00E-05 | 0.00352415 |
| 368 | LOC661444         | NC_007418.3:10645058-10664332 | 661444    | uncharacterized LOC661444                                    | 8.74035  | 21.248  | -1.191630131 | 0.0006   | 0.0297494  |
| 369 | LOC662582         | NC_007422.5:13771747-13772726 | 662582    | multiple organellar RNA editing factor 1, mitochondrial      | 3.76983  | 9.21205 | -1.098262753 | 0.0009   | 0.0416491  |
| 370 | LOC659061         | NC_007417.3:14488131-14527717 | 659061    | lipid storage droplets surface-binding protein 1             | 46.5878  | 115.724 | -1.294437564 | 5.00E-05 | 0.00352415 |
| 371 | LOC663816         | NC_007424.3:13941478-13949379 | 663816    | copper homeostasis protein cutC homolog                      | 7.56796  | 18.8192 | -1.20987508  | 0.0006   | 0.0297494  |
| 372 | LOC663158         | NC_007422.5:9227393-9230671   | 663158    | vacuolar protein-sorting-associated protein 25               | 15.8657  | 39.5866 | -1.266911291 | 5.00E-05 | 0.00352415 |
| 373 | GYP6BQ13          | NC_007417.3:2344028-2348733   | 655498    | cytochrome P450 monooxygenase                                | 19.9793  | 50.1742 | -1.286450103 | 5.00E-05 | 0.00352415 |
| 374 | LOC664132         | NC_007417.3:7752330-7760165   | 664132    | uncharacterized LOC664132                                    | 8.11401  | 20.4123 | -1.232281912 | 5.00E-05 | 0.00352415 |
| 375 | LOC100142054      | NC_007424.3:12839739-12844719 | 100142054 | carboxypeptidase D                                           | 7.49289  | 18.8606 | -1.225581739 | 5.00E-05 | 0.00352415 |
| 376 | LOC660437         | NC_007423.3:12667945-12668741 | 660437    | uncharacterized LOC660437                                    | 33.4953  | 84.4869 | -1.309303551 | 5.00E-05 | 0.00352415 |
| 377 | LOC103313299      | NC_007421.3:102795-111634     | 103313299 | uncharacterized LOC103313299                                 | 3.20777  | 8.12289 | -1.116435074 | 5.00E-05 | 0.00352415 |
| 378 | LOC100141741      | NC_007422.5:10131306-10131850 | 100141741 | endo-1,4-beta-xylanase A                                     | 326.63   | 829.259 | -1.341493991 | 5.00E-05 | 0.00352415 |
| 379 | LOC103312195      | NC_007417.3:14784008-14786298 | 103312195 | transient receptor potential cation channel protein painless | 14.2272  | 36.1335 | -1.286070621 | 5.00E-05 | 0.00352415 |
| 380 | LOC663822         | NC_007422.5:13195554-13225411 | 663822    | papilin                                                      | 0.503907 | 1.28181 | -0.601463312 | 5.00E-05 | 0.00352415 |
| 381 | ApoL1-I1          | NC_007421.3:4420485-4439966   | 663181    | apolipoporphins                                              | 192.196  | 492.282 | -1.35234742  | 5.00E-05 | 0.00352415 |
| 382 | LOC656825         | NC_007417.3:4960193-4966514   | 656825    | peroxiredoxin-6                                              | 37.713   | 97.5877 | -1.348589553 | 5.00E-05 | 0.00352415 |
| 383 | LOC659078         | NC_007418.3:5148582-5158362   | 659078    | major facilitator superfamily domain-containing protein 6    | 8.68528  | 22.7313 | -1.292925471 | 0.00095  | 0.0436105  |
| 384 | LOC656248         | NC_007418.3:1193596-1206397   | 656248    | glycerol kinase                                              | 10.22    | 26.834  | -1.310775576 | 0.0006   | 0.0297494  |
| 385 | LOC659396         | NC_007422.5:14371132-14404279 | 659396    | unc-112-related protein                                      | 12.0405  | 31.6773 | -1.325289597 | 0.0005   | 0.0259129  |
| 386 | LOC103314693      | NC_007418.3:10852617-10887120 | 103314693 | N-myc protein                                                | 8.51253  | 22.4566 | -1.302092908 | 5.00E-05 | 0.00352415 |
| 387 | H2                | NC_007417.3:14191742-14196653 | 657085    | serine protease H2                                           | 81.6972  | 216.999 | -1.398411129 | 5.00E-05 | 0.00352415 |
| 388 | LOC655021         | NC_007425.3:121815-283364     | 655021    | alpha-tocopherol transfer protein-like                       | 9.95102  | 26.5315 | -1.330017963 | 5.00E-05 | 0.00352415 |
| 389 | LOC103313284      | NC_007420.3:14473326-14486708 | 103313284 | sperm-tail PG-rich repeat-containing protein 2-like          | 1.08398  | 2.89341 | -0.901692845 | 0.00035  | 0.0194127  |
| 390 | LOC103313185      | NC_007420.3:11559385-11562424 | 103313185 | transient receptor potential cation channel protein painless | 3.05371  | 8.15128 | -1.174730666 | 5.00E-05 | 0.00352415 |

|     |                  |                               |           |                                                           |          |         |              |          |            |
|-----|------------------|-------------------------------|-----------|-----------------------------------------------------------|----------|---------|--------------|----------|------------|
| 391 | LOC103314736     | NC_007424.3:9708124-9710871   | 103314736 | uncharacterized LOC103314736                              | 6.94336  | 18.7103 | -1.311128441 | 5.00E-05 | 0.00352415 |
| 392 | LOC100141910     | NC_007416.3:1031484-1032355   | 100141910 | uncharacterized LOC100141910                              | 8.01286  | 21.6362 | -1.328574903 | 0.0003   | 0.0169681  |
| 393 | Fz2              | NC_007418.3:4400667-4448572   | 656499    | frizzled 2                                                | 5.49526  | 14.8874 | -1.290423863 | 0.00045  | 0.0239168  |
| 394 | LOC103313518     | NC_007422.5:485741-486808     | 103313518 | uncharacterized LOC103313518                              | 14.2983  | 38.871  | -1.381968445 | 5.00E-05 | 0.00352415 |
| 395 | LOC658706        | NC_007418.3:19517182-19541777 | 658706    | tolloid-like protein 1                                    | 9.82519  | 26.796  | -1.360484939 | 5.00E-05 | 0.00352415 |
| 396 | LOC660692        | NC_007416.3:7235947-7240321   | 660692    | transketolase-like protein 2                              | 168.19   | 463.358 | -1.45659319  | 5.00E-05 | 0.00352415 |
| 397 | LOC664291        | NC_007417.3:10691814-10694011 | 664291    | protein spartin                                           | 3.00823  | 8.58332 | -1.257560247 | 0.0007   | 0.0338289  |
| 398 | LOC661102        | NC_007423.3:7018361-7021997   | 661102    | alpha-esterase like protein E1                            | 1.1271   | 3.25283 | -0.999535327 | 5.00E-05 | 0.00352415 |
| 399 | LOC656039        | NC_007424.3:12446086-12447094 | 656039    | tetraspanin-8                                             | 66.5125  | 192.213 | -1.516965618 | 5.00E-05 | 0.00352415 |
| 400 | LOC654958        | NC_007421.3:1029832-1041600   | 654958    | cellular FABP-like protein                                | 166.78   | 489.233 | -1.546896851 | 0.00105  | 0.0470692  |
| 401 | LOC659318        | NC_007420.3:8350519-8364848   | 659318    | uncharacterized LOC659318                                 | 35.3372  | 103.705 | -1.526811177 | 5.00E-05 | 0.00352415 |
| 402 | LOC656405        | NC_007417.3:3308379-3309763   | 656405    | venom protease                                            | 8.51499  | 25.1128 | -1.456483117 | 0.00015  | 0.00949185 |
| 403 | LOC103314028     | NC_007423.3:11758818-11759722 | 103314028 | hypothetical protein                                      | 3.59869  | 10.6778 | -1.344473655 | 5.00E-05 | 0.00352415 |
| 404 | LOC103312583     | NC_007419.2:1728589-1756322   | 103312583 | uncharacterized LOC103312583                              | 18.8582  | 56.1503 | -1.525026213 | 5.00E-05 | 0.00352415 |
| 405 | LOC659265        | NC_007424.3:7326977-7351458   | 659265    | phosphoinositide 3-kinase regulatory subunit 4            | 3.65907  | 10.9193 | -1.3551856   | 5.00E-05 | 0.00352415 |
| 406 | LOC655389        | NC_007425.3:4332332-4345941   | 655389    | neutral alpha-glucosidase C                               | 44.1687  | 132.022 | -1.55826957  | 5.00E-05 | 0.00352415 |
| 407 | CYP6BR2: CYP6BR3 | NW_015450712.1:60752-76536    | 658247    | uncharacterized LOC658247                                 | 8.60009  | 25.7238 | -1.477005331 | 5.00E-05 | 0.00352415 |
| 408 | LOC103313084     | NC_007420.3:8150224-8151889   | 103313084 | stromelysin-1-like                                        | 1.17838  | 3.59997 | -1.07836881  | 0.00045  | 0.0239168  |
| 409 | LOC107397720     | NC_007419.2:9572226-9590168   | 107397720 | 4-coumarate--CoA ligase 2-like                            | 19.8825  | 60.8507 | -1.566495485 | 5.00E-05 | 0.00352415 |
| 410 | GLEAN_12323      | NC_007424.3:4850296-4851085   | 655079    | uncharacterized protein LOC655079                         | 5.38533  | 16.6719 | -1.468624073 | 5.00E-05 | 0.00352415 |
| 411 | LOC658487        | NC_007417.3:13021892-13025659 | 658487    | zinc finger protein GLIS2 homolog                         | 27.8875  | 86.3857 | -1.596951858 | 5.00E-05 | 0.00352415 |
| 412 | LOC664182        | NC_007422.5:11082944-11083973 | 664182    | exosome complex component MTR3                            | 4.11158  | 12.8908 | -1.442288484 | 5.00E-05 | 0.00352415 |
| 413 | LOC661049        | NC_007420.3:10003666-10012997 | 661049    | beta-lactamase-like protein 2 homolog                     | 98.5079  | 309.884 | -1.643493397 | 5.00E-05 | 0.00352415 |
| 414 | LOC661756        | NC_007419.2:2509618-2510608   | 661756    | uncharacterized LOC661756                                 | 1559.75  | 4925.9  | -1.658440724 | 5.00E-05 | 0.00352415 |
| 415 | LOC107397480     | NC_007418.3:4075263-4076325   | 107397480 | uncharacterized LOC107397480                              | 38.3833  | 123.176 | -1.656730457 | 5.00E-05 | 0.00352415 |
| 416 | LOC103315089     | NC_007417.3:9904557-9905076   | 103315089 | hypothetical protein                                      | 11.1065  | 35.9131 | -1.608351061 | 5.00E-05 | 0.00352415 |
| 417 | LOC661884        | NC_007420.3:10074491-10080962 | 661884    | cilia- and flagella-associated protein 47                 | 0.320949 | 1.0423  | -0.628620037 | 5.00E-05 | 0.00352415 |
| 418 | LOC664253        | NC_007423.3:9280816-9281998   | 664253    | retinol dehydrogenase 11-like                             | 4.08079  | 13.2653 | -1.489385346 | 5.00E-05 | 0.00352415 |
| 419 | LOC655889        | NC_007418.3:19944068-19950826 | 655889    | jouberin                                                  | 12.3982  | 40.3232 | -1.624912786 | 5.00E-05 | 0.00352415 |
| 420 | P80              | NC_007419.2:11668481-11669467 | 655599    | serine protease P80                                       | 216.959  | 716.252 | -1.718423309 | 5.00E-05 | 0.00352415 |
| 421 | kinesin-5C       | NC_007418.3:18199240-18204036 | 656336    | kinesin 5C                                                | 0.957241 | 3.16133 | -1.088223291 | 5.00E-05 | 0.00352415 |
| 422 | sPLA2C           | NC_007420.3:9902767-9903984   | 659784    | phospholipase A2C                                         | 8.46914  | 28.2842 | -1.628817173 | 5.00E-05 | 0.00352415 |
| 423 | LOC103313391     | NC_007421.3:3343020-3343468   | 103313391 | uncharacterized LOC103313391                              | 261.497  | 874.729 | -1.738183553 | 5.00E-05 | 0.00352415 |
| 424 | LOC654983        | NC_007419.2:7071287-7072137   | 654983    | cuticle protein 63                                        | 6.60227  | 22.3129 | -1.61662631  | 5.00E-05 | 0.00352415 |
| 425 | LOC657081        | NC_007425.3:5474613-5478061   | 657081    | innexin inx7                                              | 2.43559  | 8.57454 | -1.478645299 | 5.00E-05 | 0.00352415 |
| 426 | LOC103314603     | NC_007418.3:15659344-15661900 | 103314603 | putative nuclease HARB11                                  | 3.9694   | 14.2416 | -1.616870781 | 5.00E-05 | 0.00352415 |
| 427 | LOC103313539     | NC_007422.5:830025-860944     | 103313539 | uncharacterized LOC103313539                              | 18.7096  | 67.1462 | -1.789734713 | 5.00E-05 | 0.00352415 |
| 428 | LOC662944        | NC_007422.5:7373905-7398504   | 662944    | sodium/hydrogen exchanger 10                              | 52.6121  | 190.67  | -1.837993993 | 0.0001   | 0.00663971 |
| 429 | serpin31         | NC_007423.3:7024846-7026186   | 661214    | serpin peptidase inhibitor 31                             | 9.01205  | 32.8776 | -1.758594272 | 5.00E-05 | 0.00352415 |
| 430 | CYP346B1         | NC_007420.3:9724498-9730156   | 657187    | cytochrome P450 346B1                                     | 10.155   | 37.2619 | -1.778218003 | 5.00E-05 | 0.00352415 |
| 431 | LOC103313512     | NC_007422.5:495848-496453     | 103313512 | holotricin-3-like                                         | 4.43345  | 16.3598 | -1.675809885 | 5.00E-05 | 0.00352415 |
| 432 | LOC661699        | NC_007424.3:15467402-15468942 | 661699    | radical S-adenosyl methionine domain-containing protein 2 | 12.3567  | 45.6851 | -1.805398564 | 5.00E-05 | 0.00352415 |
| 433 | LOC657759        | NW_015451620.1:66054-87805    | 657759    | thymidylate synthase                                      | 3.5668   | 13.2108 | -1.637732259 | 5.00E-05 | 0.00352415 |
| 434 | -                | NW_015451451.1:748-3157       | -         | -                                                         | 2.7263   | 10.1745 | -1.584394546 | 5.00E-05 | 0.00352415 |

|     |                   |                               |           |                                                   |  |           |          |              |          |            |
|-----|-------------------|-------------------------------|-----------|---------------------------------------------------|--|-----------|----------|--------------|----------|------------|
| 435 | -                 | NC_007417.3:170837-175251     | -         | -                                                 |  | 9.42185   | 35.3481  | -1.802268558 | 5.00E-05 | 0.00352415 |
| 436 | LOC658244         | NC_007420.3:970982-981609     | 658244    | uncharacterized LOC658244                         |  | 1.42336   | 5.45437  | -1.413267544 | 5.00E-05 | 0.00352415 |
| 437 | LOC657670         | NC_007424.3:5685639-5714053   | 657670    | patched domain-containing protein 3               |  | 16.2554   | 62.6441  | -1.882978861 | 5.00E-05 | 0.00352415 |
| 438 | LOC103312302      | NC_007418.3:30184276-30184770 | 103312302 | uncharacterized LOC103312302                      |  | 118.485   | 467.497  | -1.971210294 | 5.00E-05 | 0.00352415 |
| 439 | LOC660178         | NC_007421.3:367354-376893     | 660178    | fatty acid synthase                               |  | 0.167013  | 0.662965 | -0.510937173 | 0.0002   | 0.0120247  |
| 440 | ilr1: InR         | NC_007416.3:5210343-5247750   | 661524    | insulin-like receptor                             |  | 2.38565   | 9.54539  | -1.639107707 | 0.00095  | 0.0436105  |
| 441 | Z9desB            | NW_015450728.1:196850-224677  | 657939    | Z9 acyl-CoA desaturase B                          |  | 19.4274   | 77.8752  | -1.949066169 | 5.00E-05 | 0.00352415 |
| 442 | LOC655542         | NC_007423.3:7118455-7124552   | 655542    | ribosome biogenesis protein BMS1 homolog          |  | 1.54215   | 6.18561  | -1.499061476 | 5.00E-05 | 0.00352415 |
| 443 | Gda7              | NC_007420.3:6635069-6636388   | 100126689 | chitin deacetylase 7                              |  | 5.10141   | 20.5562  | -1.820888293 | 5.00E-05 | 0.00352415 |
| 444 | LOC655598         | NC_007419.2:9628012-9630052   | 655598    | TBC1 domain family member 19                      |  | 0.453191  | 1.86905  | -0.981348775 | 0.0001   | 0.00663971 |
| 445 | LOC103314558      | NW_015451937.1:352665-366702  | 103314558 | uncharacterized LOC103314558                      |  | 0.590404  | 2.45871  | -1.120840764 | 0.00015  | 0.00949185 |
| 446 | LOC659172         | NC_007420.3:5755461-5757901   | 659172    | hypothetical protein                              |  | 0.901662  | 3.86246  | -1.354425537 | 0.0007   | 0.0338289  |
| 447 | LOC656478         | NW_015450245.1:57584-72054    | 656478    | acyl-CoA Delta(11) desaturase-like                |  | 10.6022   | 45.7477  | -2.010496992 | 5.00E-05 | 0.00352415 |
| 448 | LOC658435         | NC_007421.3:3462031-3465600   | 658435    | cytosolic 10-formyltetrahydrofolate dehydrogenase |  | 3.57965   | 15.4737  | -1.846855372 | 5.00E-05 | 0.00352415 |
| 449 | LOC103313827      | NC_007422.5:14515184-14556050 | 103313827 | monocarboxylate transporter 7                     |  | 7.62668   | 33.5906  | -2.003502692 | 0.00015  | 0.00949185 |
| 450 | LOC662305         | NC_007422.5:13796663-13799189 | 662305    | protein DEK                                       |  | 5.00793   | 22.4606  | -1.965300002 | 5.00E-05 | 0.00352415 |
| 451 | LOC103315154      | NC_007417.3:5901445-5903598   | 103315154 | leucine-rich repeat-containing protein let-4-like |  | 0.393696  | 1.78656  | -0.99956931  | 0.0002   | 0.0120247  |
| 452 | LOC660364         | NC_007421.3:5683714-5691537   | 660364    | band 7 protein AGAP004871                         |  | 2.41607   | 11.268   | -1.844490629 | 5.00E-05 | 0.00352415 |
| 453 | LOC662610         | NC_007421.3:1565076-1569411   | 662610    | putative fatty acyl-CoA reductase CG5065          |  | 2.68057   | 12.5937  | -1.884937074 | 0.00015  | 0.00949185 |
| 454 | LOC103313579      | NC_007422.5:3192754-3200292   | 103313579 | receptor-type tyrosine-protein phosphatase kappa  |  | 0.510908  | 2.55092  | -1.232777041 | 5.00E-05 | 0.00352415 |
| 455 | gag               | NW_015450678.1:10650-15931    | 100141955 | ORF 1                                             |  | 0.547611  | 2.75826  | -1.280021989 | 5.00E-05 | 0.00352415 |
| 456 | LOC103314314      | NC_007424.3:13079595-13137188 | 103314314 | brachyurin                                        |  | 390.767   | 2020.48  | -2.367344146 | 0.00045  | 0.0239168  |
| 457 | LOC103312247      | NC_007418.3:1081163-1087966   | 103312247 | intraflagellar transport protein 43 homolog       |  | 1.0107    | 5.23447  | -1.632569075 | 5.00E-05 | 0.00352415 |
| 458 | LOC661074         | NC_007424.3:15596693-15598718 | 661074    | carboxylesterase 1E                               |  | 1.62205   | 8.86383  | -1.911452739 | 5.00E-05 | 0.00352415 |
| 459 | Akh2              | NC_007420.3:13480284-13480639 | 663044    | adipokinetic hormone 2                            |  | 6.95522   | 38.17    | -2.299775395 | 5.00E-05 | 0.00352415 |
| 460 | LOC107399289      | NC_007417.3:9749344-9751437   | 107399289 | sodium channel protein Nach-like                  |  | 0.232501  | 1.30933  | -0.90588553  | 0.00085  | 0.0395751  |
| 461 | LOC107398763      | NC_007425.3:4207123-4208204   | 107398763 | uncharacterized LOC107398763                      |  | 16.6393   | 104.424  | -2.579338122 | 5.00E-05 | 0.00352415 |
| 462 | LOC655322         | NW_015452040.1:14345-15937    | 655322    | venom carboxylesterase-6-like                     |  | 0.315282  | 1.98004  | -1.179959545 | 0.00015  | 0.00949185 |
| 463 | LOC661561         | NC_007423.3:3374630-3390831   | 661561    | annexin A7                                        |  | 9.76415   | 61.6714  | -2.541572821 | 0.0003   | 0.0169681  |
| 464 | LOC656604         | NC_007423.3:9636269-9638323   | 656604    | venom carboxylesterase-6                          |  | 1.57375   | 11.1145  | -2.234791032 | 5.00E-05 | 0.00352415 |
| 465 | LOC656826         | NC_007425.3:2117796-2123085   | 656826    | phospholipase A1-like                             |  | 5.97957   | 42.2679  | -2.632087039 | 5.00E-05 | 0.00352415 |
| 466 | GLEAN_02953       | NC_007418.3:5837554-5838654   | 663117    | cathepsin B precursor                             |  | 5.93956   | 42.8701  | -2.660321898 | 5.00E-05 | 0.00352415 |
| 467 | LOC107397872      | NC_007419.2:12238272-12284334 | 107397872 | uncharacterized LOC107397872                      |  | 0.13632   | 1.05615  | -0.855576345 | 0.0003   | 0.0169681  |
| 468 | LOC660377         | NC_007423.3:10431640-10433201 | 660377    | putative protein TPRXL                            |  | 21.7418   | 174.968  | -2.951894745 | 5.00E-05 | 0.00352415 |
| 469 | Crp1-g            | NC_007422.5:11276727-11280065 | 664005    | cuticular protein analogous to peritrophins 1-G   |  | 0.47327   | 3.903    | -1.73464291  | 5.00E-05 | 0.00352415 |
| 470 | LOC662640         | NC_007420.3:6930369-6932879   | 662640    | facilitated trehalose transporter Tret1           |  | 2.65113   | 22.7008  | -2.698520814 | 5.00E-05 | 0.00352415 |
| 471 | LOC660146         | NC_007420.3:7392974-7394114   | 660146    | uncharacterized LOC660146                         |  | 11.7103   | 102.602  | -3.026981866 | 5.00E-05 | 0.00352415 |
| 472 | LOC658176         | NW_015450462.1:7116-21537     | 658176    | phosphoribosylformylglycinamide synthase          |  | 0.0669483 | 0.603053 | -0.587331854 | 0.0002   | 0.0120247  |
| 473 | OBP-C11: TcOBP10A | NC_007425.3:5617055-5726603   | 656161    | odorant binding protein C11                       |  | 1085.48   | 10247.1  | -3.237622936 | 5.00E-05 | 0.00352415 |
| 474 | -                 | NC_007419.2:12284404-12286440 | -         | -                                                 |  | 0.168842  | 2.05763  | -1.387333914 | 5.00E-05 | 0.00352415 |
| 475 | P23: P24          | NC_007417.3:12101023-12102083 | 662758    | serine protease P23                               |  | 1.09272   | 13.8693  | -2.82888553  | 5.00E-05 | 0.00352415 |
| 476 | LOC657170         | NC_007417.3:14197609-14198889 | 657170    | trypsin II-P29                                    |  | 2.25799   | 34.4754  | -3.444764871 | 5.00E-05 | 0.00352415 |
| 477 | LOC100141893      | NC_007419.2:6662033-6671668   | 100141893 | uncharacterized LOC100141893                      |  | 0.169954  | 2.85942  | -1.721932246 | 0.00025  | 0.014684   |
| 478 | LOC103312301      | NC_007418.3:30148152-30149679 | 103312301 | salivary glue protein Sgs-3-like                  |  | 4.55894   | 112.39   | -4.350339792 | 5.00E-05 | 0.00352415 |

|     |              |                               |           |                                             |          |          |              |          |            |
|-----|--------------|-------------------------------|-----------|---------------------------------------------|----------|----------|--------------|----------|------------|
| 479 | LOC657322    | NC_007418.3:4131236-4149119   | 657322    | venom carboxylesterase-6                    | 2.1112   | 52.1333  | -4.094073273 | 0.0001   | 0.00663971 |
| 480 | LOC107397926 | NC_007420.3:5233008-5233767   | 107397926 | protein NPC2 homolog                        | 1.24216  | 33.5822  | -3.947068514 | 0.0001   | 0.00663971 |
| 481 | -            | NC_007417.3:551923-552167     | -         | -                                           | 0        | 6.69672  | -2.944243764 | 5.00E-05 | 0.00352415 |
| 482 | Nplp3        | NC_007418.3:4125382-4126111   | 657788    | cuticle protein 38                          | 0        | 0.947354 | -0.961515168 | 5.00E-05 | 0.00352415 |
| 483 | LOC103313848 | NC_007418.3:4126508-4126952   | 103313848 | cuticle protein 63                          | 0        | 1.45399  | -1.29512937  | 5.00E-05 | 0.00352415 |
| 484 | -            | NC_007419.2:3198051-3198703   | -         | -                                           | 0        | 1.21861  | -1.149656085 | 5.00E-05 | 0.00352415 |
| 485 | LOC659176    | NC_007420.3:11255780-11256299 | 659176    | endocuticle structural glycoprotein SgAbd-5 | 0        | 0.822036 | -0.865551464 | 0.001    | 0.0455408  |
| 486 | LOC661258    | NC_007420.3:6421267-6421839   | 661258    | uncharacterized LOC661258                   | 0        | 0.909295 | -0.933040027 | 5.00E-05 | 0.00352415 |
| 487 | LOC659862    | NC_007421.3:9318737-9323082   | 659862    | facilitated trehalose transporter Tret1     | 0        | 0.863507 | -0.898020238 | 5.00E-05 | 0.00352415 |
| 488 | -            | NC_007421.3:9911374-9911849   | -         | -                                           | 0        | 0.995359 | -0.996648336 | 5.00E-05 | 0.00352415 |
| 489 | LOC107398740 | NC_007425.3:1800702-1804977   | 107398740 | uncharacterized LOC107398740                | 0        | 5.50343  | -2.701200816 | 5.00E-05 | 0.00352415 |
| 490 | LOC656244    | NC_007425.3:6352529-6394030   | 656244    | coiled-coil domain-containing protein 186   | 0        | 2.45839  | -1.79010057  | 0.00105  | 0.0470692  |
| 491 | -            | NC_007425.3:17670-18339       | -         | -                                           | 0        | 0.986724 | -0.990391464 | 5.00E-05 | 0.00352415 |
| 492 | -            | NC_007425.3:1799904-1800625   | -         | -                                           | 0        | 3.58448  | -2.196758104 | 5.00E-05 | 0.00352415 |
| 493 | -            | NC_007425.3:1821835-1822113   | -         | -                                           | 0        | 5.02834  | -2.591760788 | 5.00E-05 | 0.00352415 |
| 494 | -            | NW_015450315.1:75893-76156    | -         | -                                           | 0        | 2.64416  | -1.865586303 | 5.00E-05 | 0.00352415 |
| 495 | -            | NW_015450524.1:3960-4092      | -         | -                                           | 0        | 52.6068  | -5.744344112 | 5.00E-05 | 0.00352415 |
| 496 | LOC100142598 | NW_015450864.1:165-1246       | 100142598 | uncharacterized LOC100142598                | 0        | 1.79018  | -1.480358196 | 5.00E-05 | 0.00352415 |
| 497 | -            | NW_015451540.1:63-872         | -         | -                                           | 0        | 4.81272  | -2.539213415 | 5.00E-05 | 0.00352415 |
| 498 | -            | NW_015451645.1:2730-3133      | -         | -                                           | 0        | 1.1935   | -1.133234706 | 0.00025  | 0.014684   |
| 499 | -            | NW_015451645.1:3193-4113      | -         | -                                           | 0        | 0.637644 | -0.71162177  | 5.00E-05 | 0.00352415 |
| 500 | -            | NW_015452269.1:21-416         | -         | -                                           | 0        | 36.036   | -5.210856386 | 5.00E-05 | 0.00352415 |
| 501 | -            | NC_007416.3:8469639-8469930   | -         | -                                           | 2.33447  | 0        | 1.737457469  | 0.00055  | 0.0281853  |
| 502 | LOC661960    | NC_007417.3:13341079-13411736 | 661960    | Kv channel-interacting protein 1            | 1.10321  | 0        | 1.072592907  | 0.00105  | 0.0470692  |
| 503 | LOC107397543 | NC_007418.3:11927693-11928397 | 107397543 | uncharacterized LOC107397543                | 0.660694 | 0        | 0.731786266  | 5.00E-05 | 0.00352415 |
| 504 | -            | NC_007419.2:3699714-3700168   | -         | -                                           | 2.03159  | 0        | 1.600074653  | 5.00E-05 | 0.00352415 |
| 505 | LOC103313177 | NC_007420.3:11317219-11317627 | 103313177 | carbonyl reductase [NADPH                   | 3.22002  | 0        | 2.077249836  | 5.00E-05 | 0.00352415 |
| 506 | LOC107398167 | NC_007422.5:6049962-6051382   | 107398167 | serine protease easter-like                 | 0.675544 | 0        | 0.744629572  | 5.00E-05 | 0.00352415 |
| 507 | LOC107398427 | NC_007423.3:747341-747788     | 107398427 | uncharacterized LOC107398427                | 1.91857  | 0        | 1.545261671  | 5.00E-05 | 0.00352415 |
| 508 | LOC655293    | NC_007423.3:2323500-2324587   | 655293    | circumsporozoite protein                    | 0.570097 | 0        | 0.650853691  | 5.00E-05 | 0.00352415 |
| 509 | -            | NC_007425.3:5237995-5238530   | -         | -                                           | 2.04683  | 0        | 1.607309006  | 5.00E-05 | 0.00352415 |
| 510 | LOC103312403 | NW_015450265.1:237-1091       | 103312403 | uncharacterized LOC103312403                | 2.02857  | 0        | 1.598636757  | 5.00E-05 | 0.00352415 |
| 511 | LOC103312400 | NW_015450265.1:1399-4048      | 103312400 | uncharacterized LOC103312400                | 0.728572 | 0        | 0.789580697  | 5.00E-05 | 0.00352415 |
| 512 | -            | NW_015450434.1:88-653         | -         | -                                           | 1.47712  | 0        | 1.308663759  | 5.00E-05 | 0.00352415 |
| 513 | -            | NW_015451025.1:44472-44704    | -         | -                                           | 13.879   | 0        | 3.895205663  | 5.00E-05 | 0.00352415 |
| 514 | -            | NW_015451646.1:102584-103025  | -         | -                                           | 2.75602  | 0        | 1.909204745  | 5.00E-05 | 0.00352415 |
| 515 | -            | NW_015451646.1:104058-104832  | -         | -                                           | 1.69542  | 0        | 1.430510091  | 5.00E-05 | 0.00352415 |
| 516 | -            | NW_015451723.1:7990-9393      | -         | -                                           | 0.721019 | 0        | 0.783263025  | 5.00E-05 | 0.00352415 |
| 517 | -            | NW_015451840.1:901-1036       | -         | -                                           | 54.374   | 0        | 5.791136835  | 5.00E-05 | 0.00352415 |
| 518 | -            | NW_015451896.1:48504-48829    | -         | -                                           | 3.55401  | 0        | 2.187137459  | 5.00E-05 | 0.00352415 |
