# Supplementary material for: Transcriptomic comparison between beetle strains selected for short and long durations of death feigning
Source: PubMed Central journal article supplement (PMC6768993; doi:10.1038/s41598-019-50440-5), 2019-09-30
Supplement: 41598_2019_50440_MOESM3_ESM.pdf [file 41598_2019_50440_MOESM3_ESM.pdf]

Title page for S3 Table

**The title of manuscript:** Transcriptomic comparison between beetle strains selected for short and long durations of death feigning.

**The author list:**

Hironobu Uchiyama

Ken Sasaki

Shogo Hinosawa

Keisuke Tanaka

Kentarou Matsumura

Shunsuke Yajima

Takahisa Miyatake

S3 Table. Primer sequences for qPCR analyses.

| Gene            | Primer             | Primer sequence           | Note                                |
|-----------------|--------------------|---------------------------|-------------------------------------|
| Reference genes |                    |                           |                                     |
| <i>Tcact</i>    | <i>Tc-act-Fw</i>   | TCCATCATGAAGTGCGATGT      | actin (Act)                         |
|                 | <i>Tc-act-Rv</i>   | CACCGATCCAGACGGAGTAT      |                                     |
| <i>Tctbpaf</i>  | <i>Tc-tbpaf-Fw</i> | GAAAGCGTGCTTTAGCCAAG      | tbp-association factor (Tbpaf)      |
|                 | <i>Tc-tbpaf-Rv</i> | GGTGCTTACGCCAGTGGTAT      |                                     |
| Target genes    |                    |                           |                                     |
| <i>Tctat</i>    | <i>Tc-tat-Fw</i>   | AAAGCCGAAAAGTGGGAAGT      | tyrosine aminotransferase (Tat)     |
|                 | <i>Tc-tat-Rv</i>   | GGGTTTCAAGTTGCCGTAAA      |                                     |
| <i>Tchpd</i>    | <i>Tc-hpd2-Fw</i>  | TTTGATGGCTAGAGGGGTTG      | 4-hydroxyphenylpyruvate dioxygenase |
|                 | <i>Tc-hpd2-Rv</i>  | CAGCAAATACCCCTTGTCGT      | (Hpd)                               |
| <i>Tcddc</i>    | <i>Tc-ddc3-Fw</i>  | CGTGAGGCTGGCCTTATTCCATTT  | DOPA decarboxylase (Ddc), designed  |
|                 | <i>Tc-ddc3-Rv</i>  | GTGCAGCCAGATGTTGTTTCGAGTT | by Arakane et al. (2009)            |
| <i>Tcnat</i>    | <i>Tc-nat-Fw</i>   | AACTGGGCTGCGGTATAATG      | N-acetyltransferase (Nat)           |
|                 | <i>Tc-nat-Rv</i>   | GCCTTGTGGCACGATTATTT      |                                     |
